# Supplementary material for: A-to-I editing in the miRNA seed region regulates target mRNA selection and silencing efficiency
Source: PubMed Central journal article supplement (PMC4150774; doi:10.1093/nar/gku662), 2014-07-23
Supplement: supp_gku662_nar-01179-y-2014-File003.pdf [file supp_gku662_nar-01179-y-2014-File003.pdf]

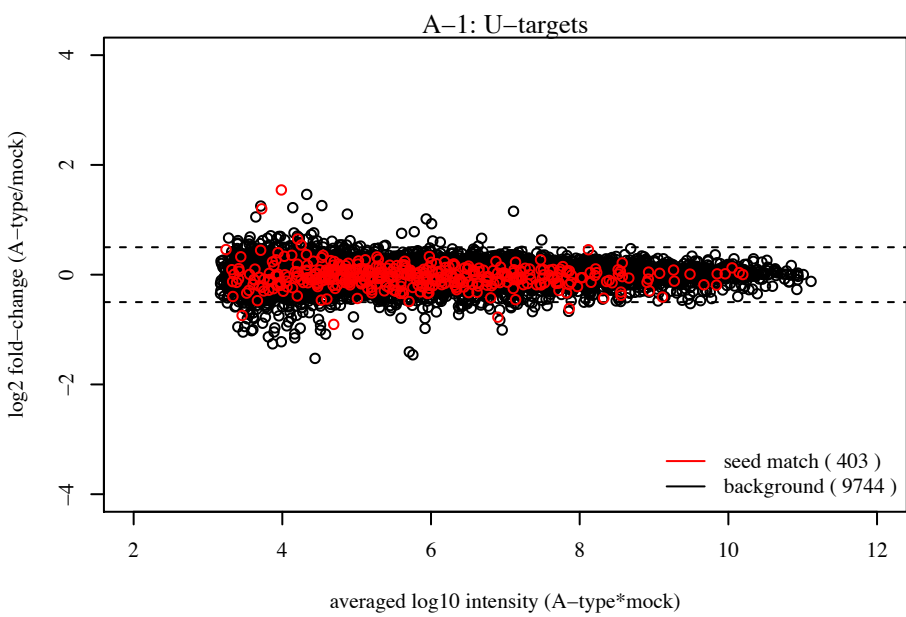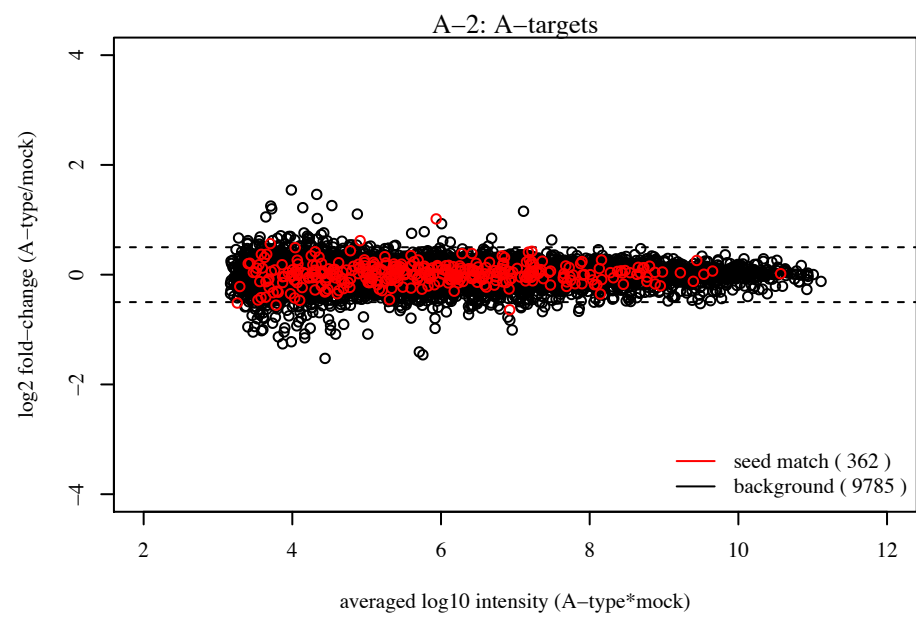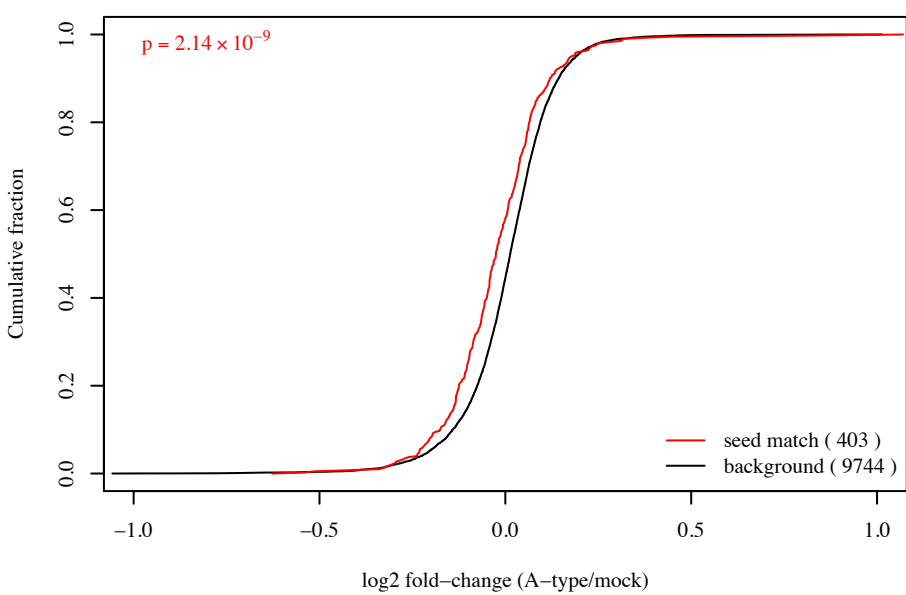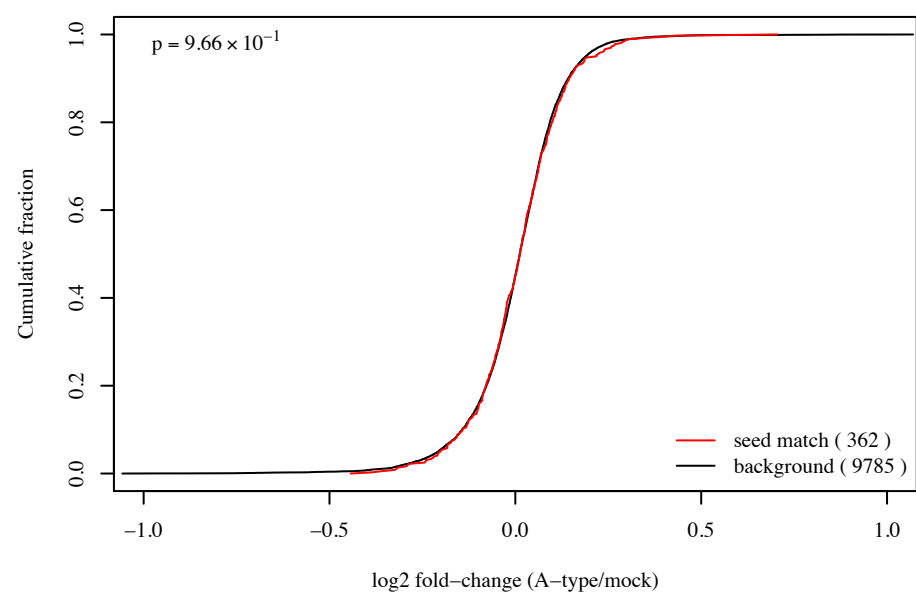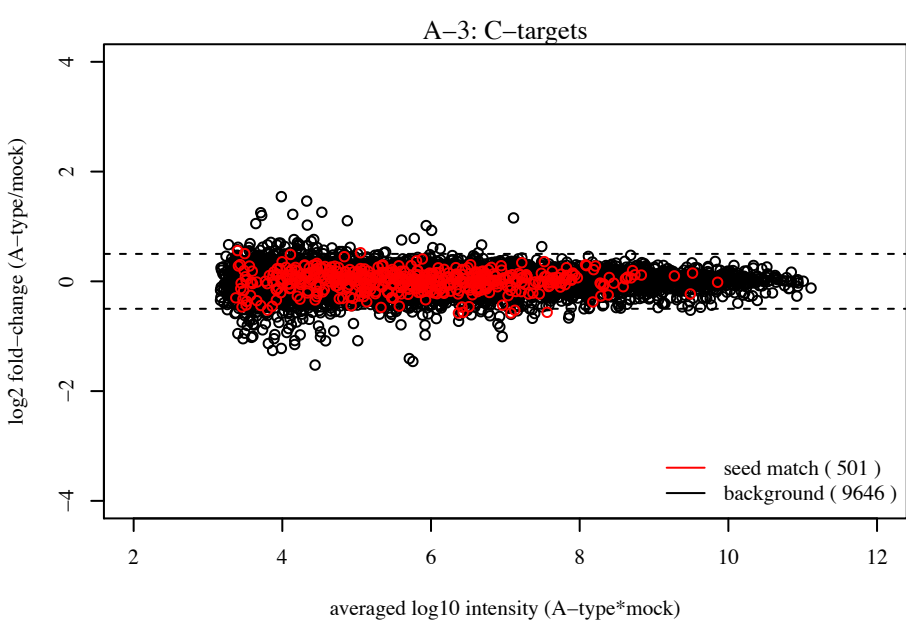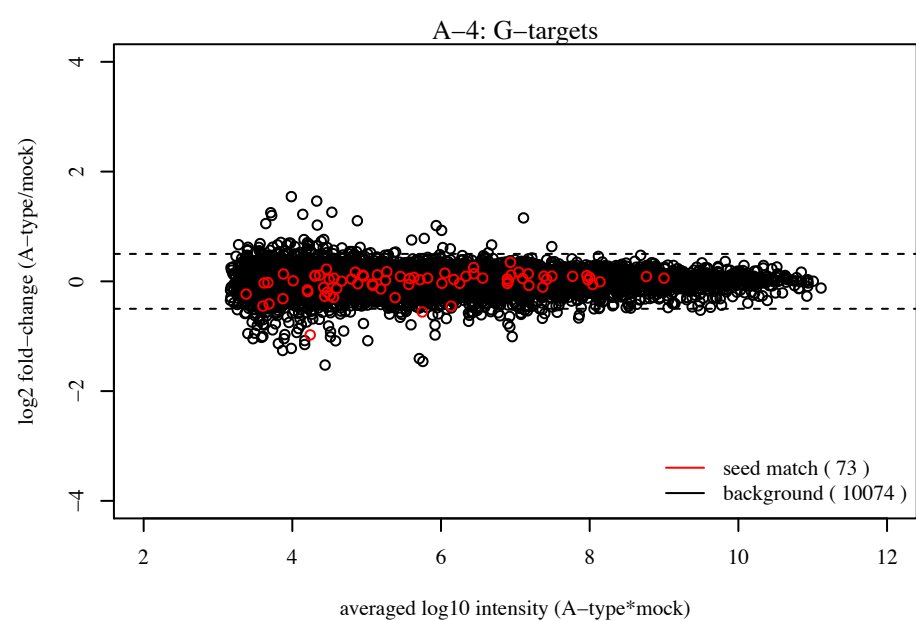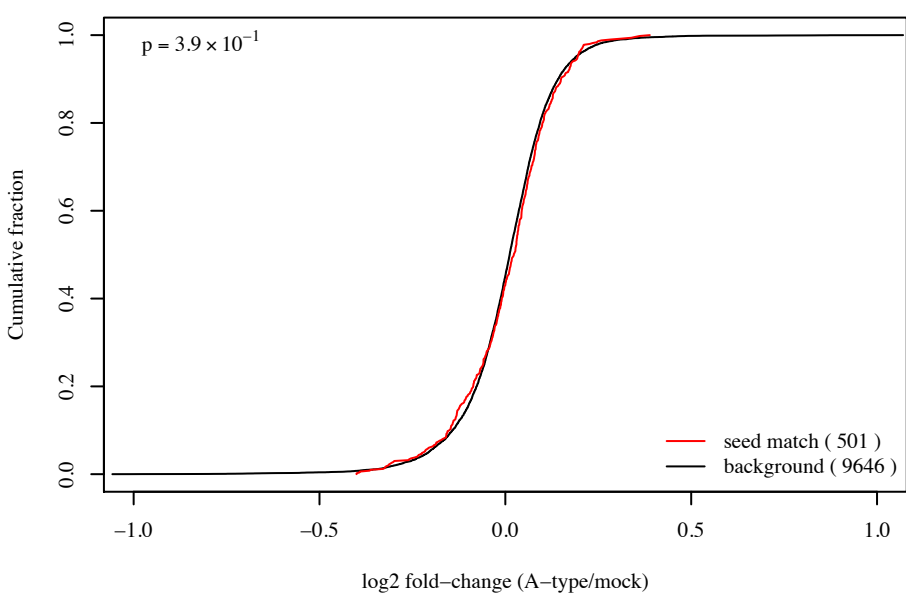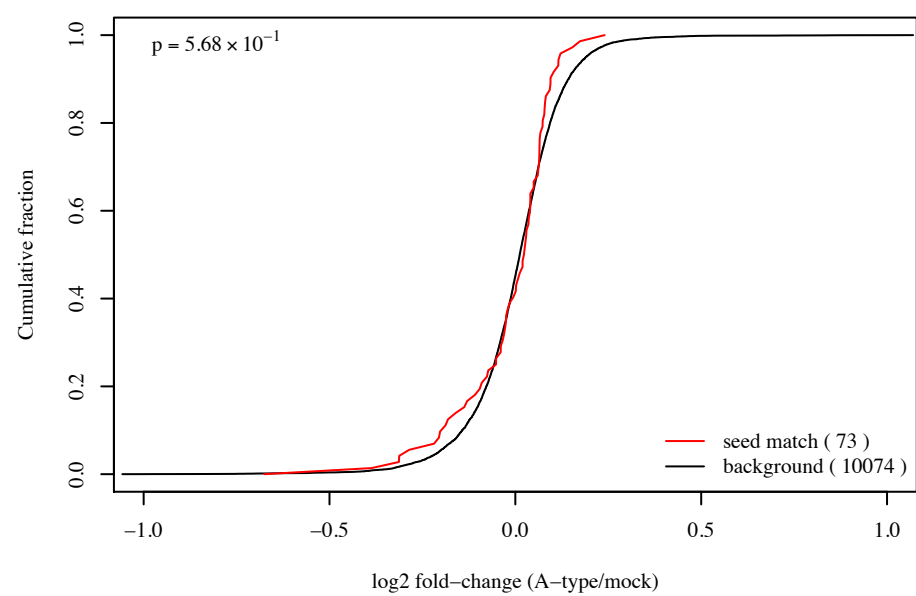

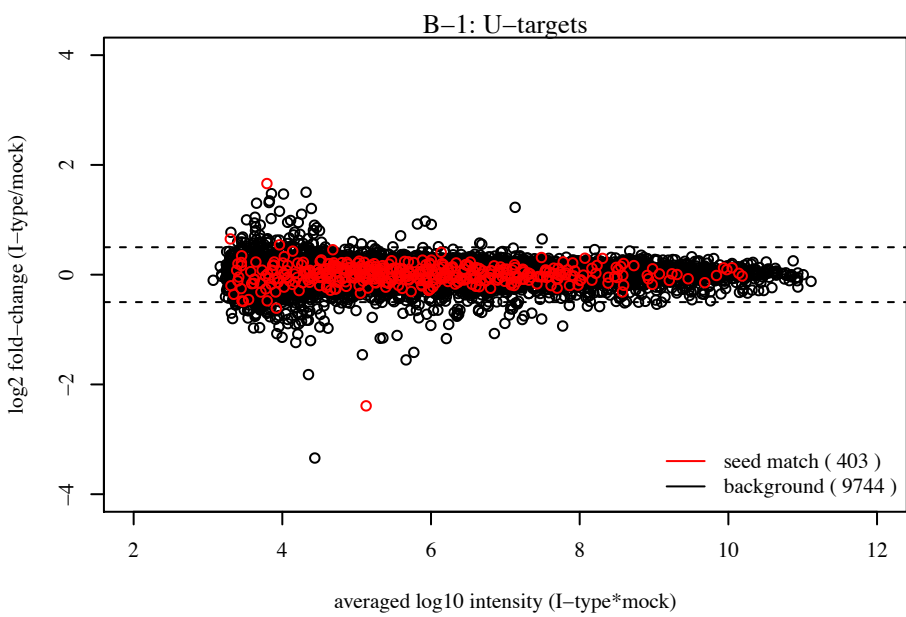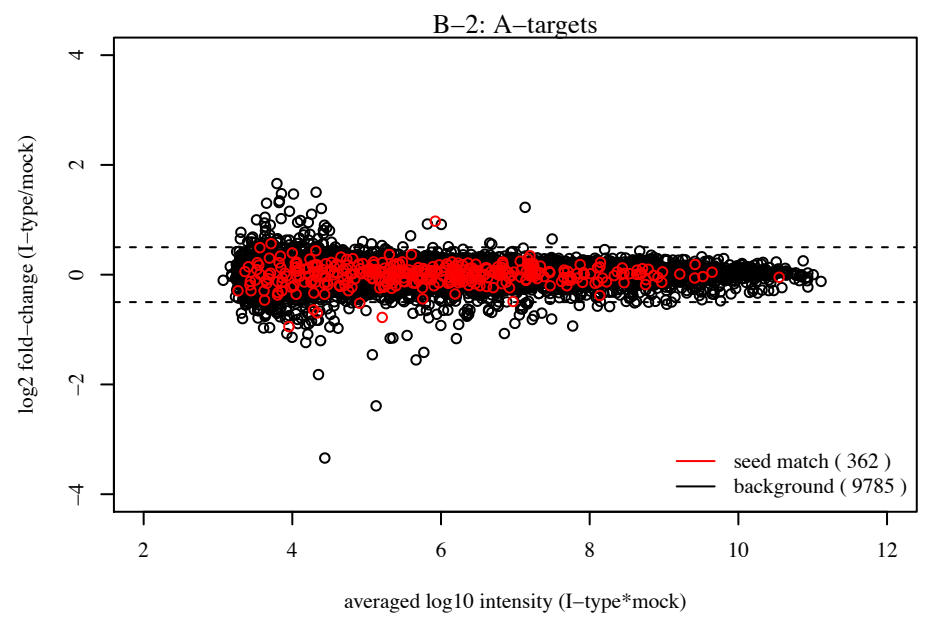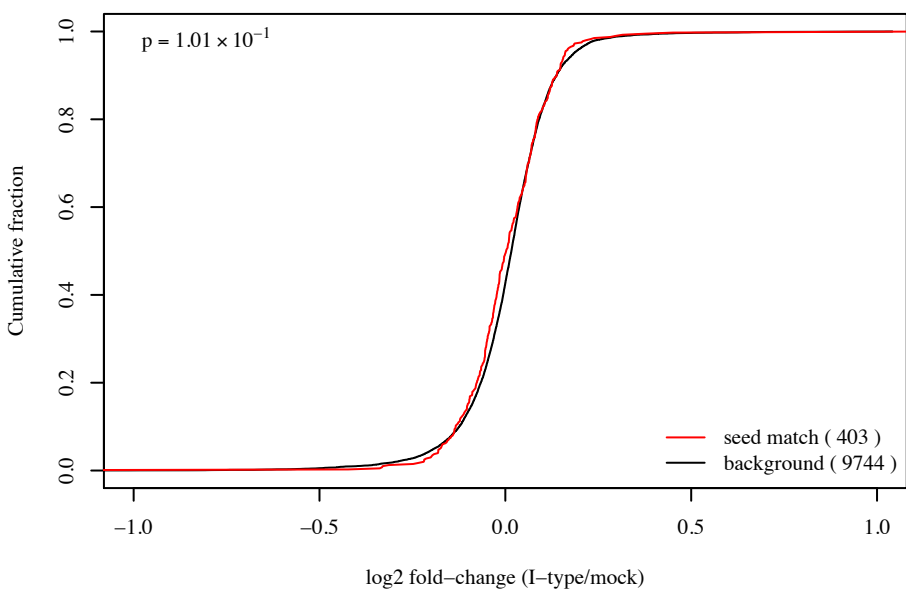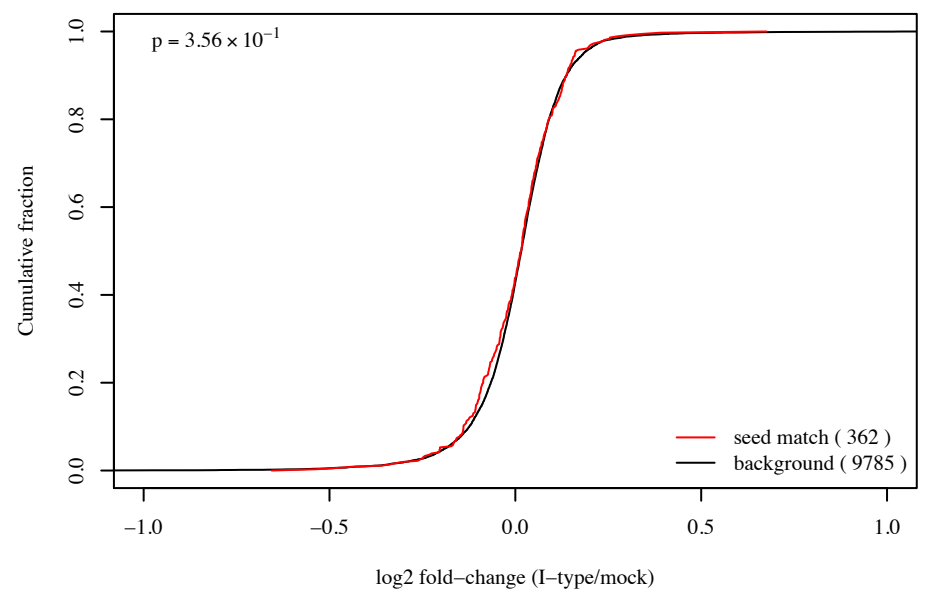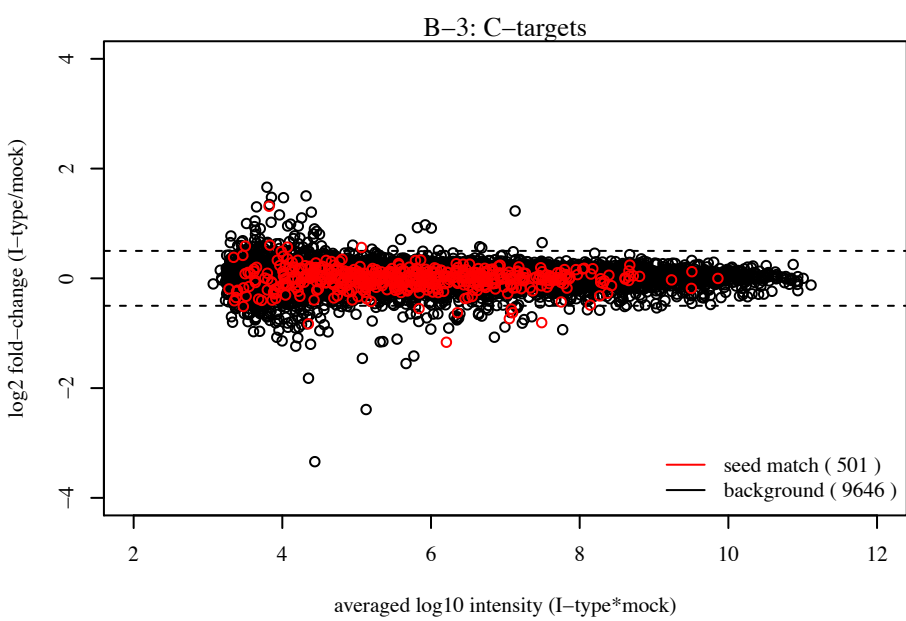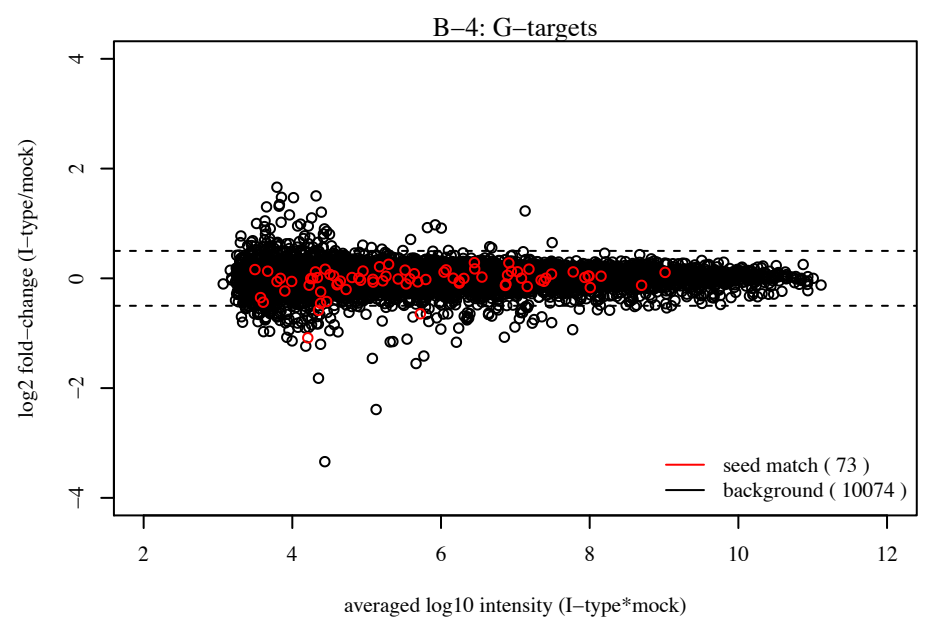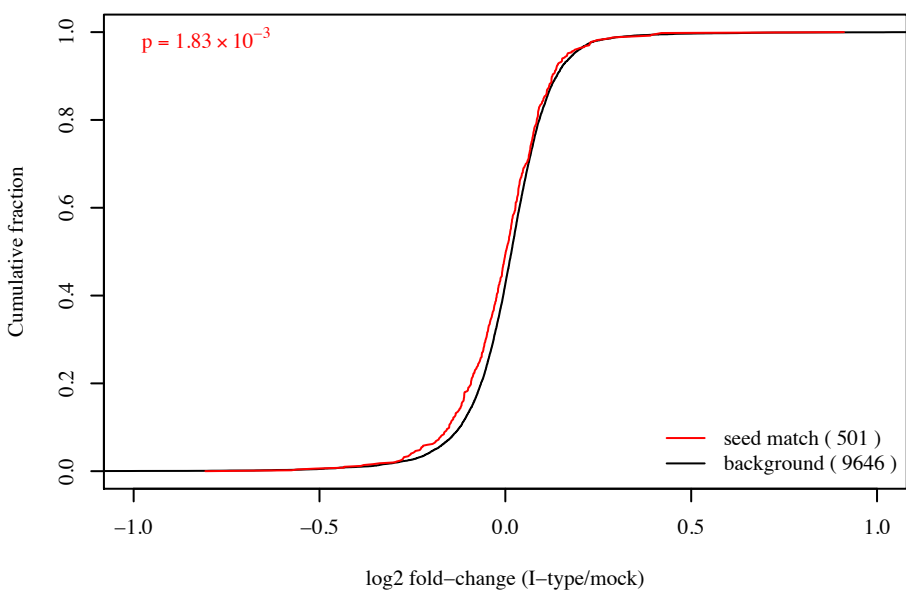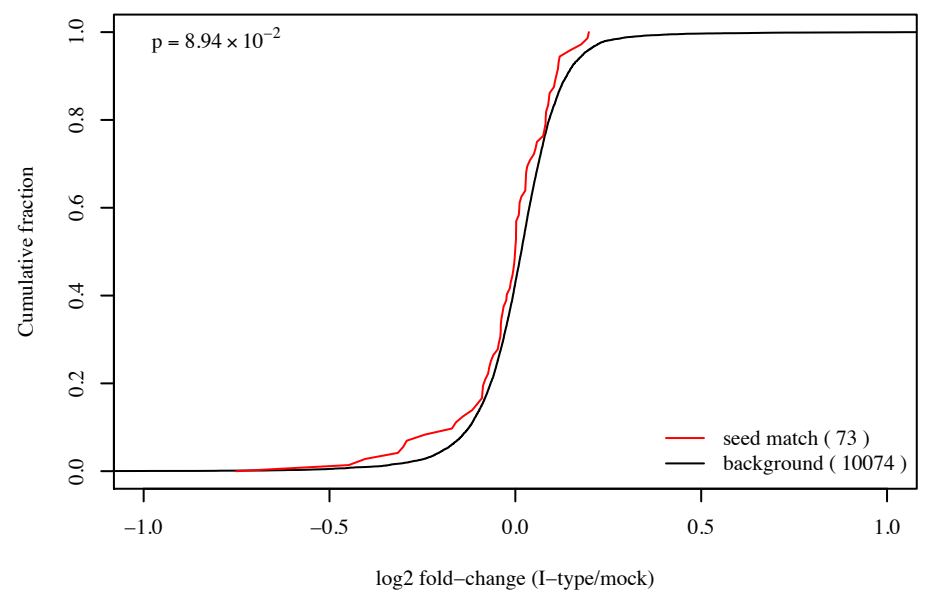

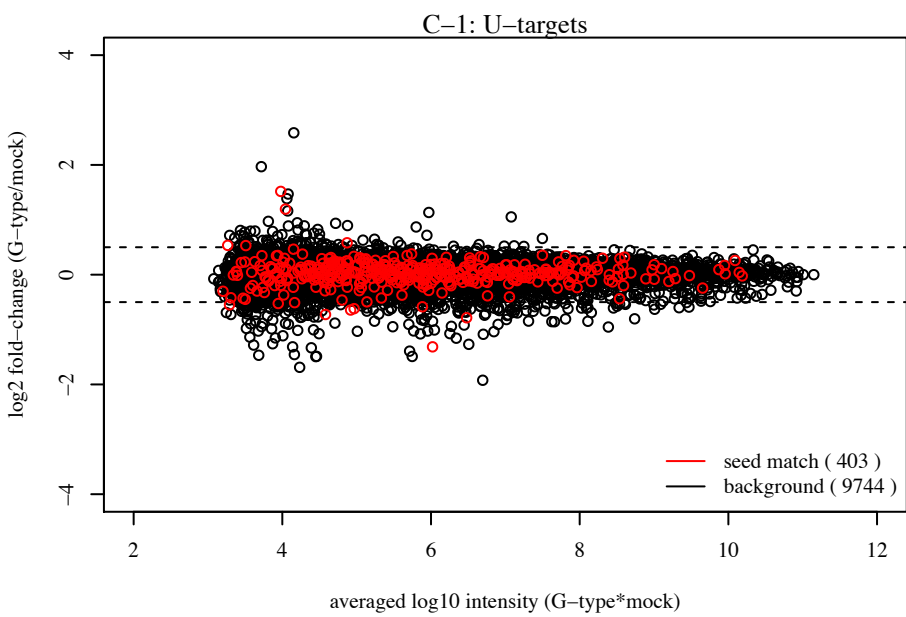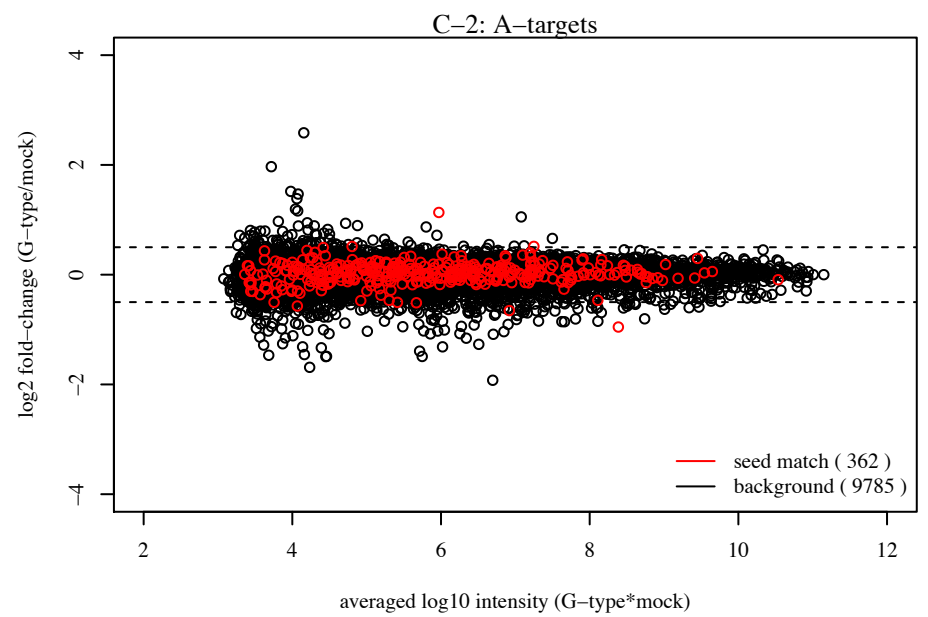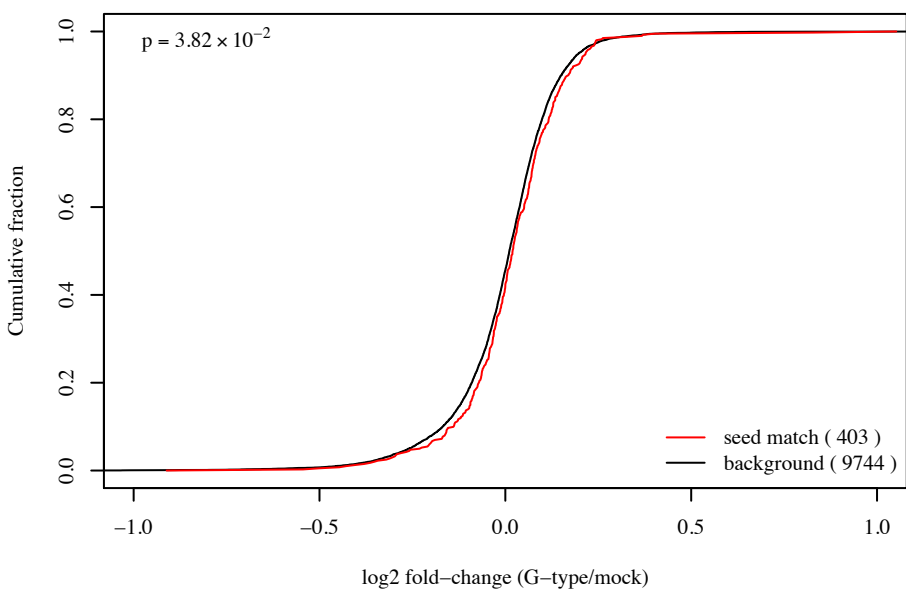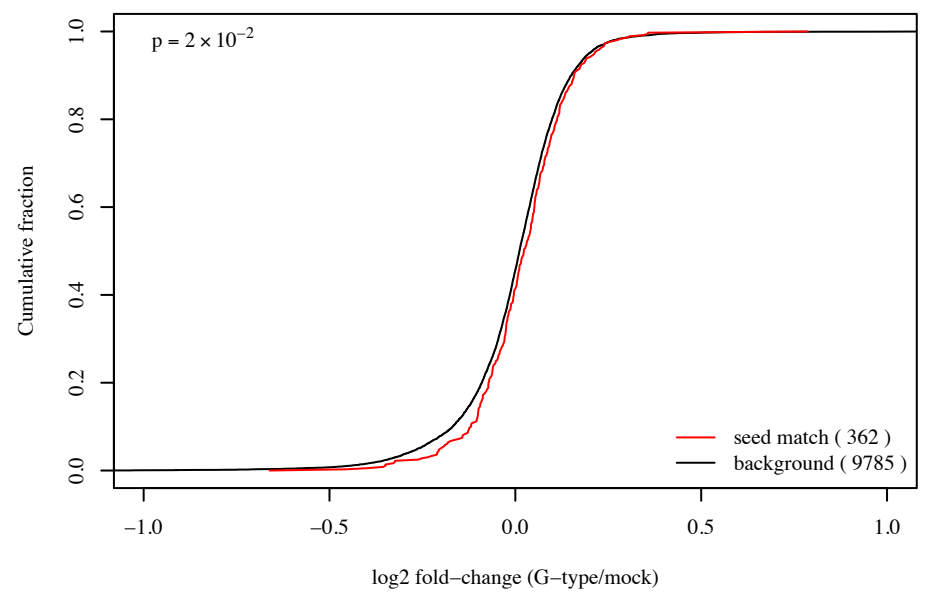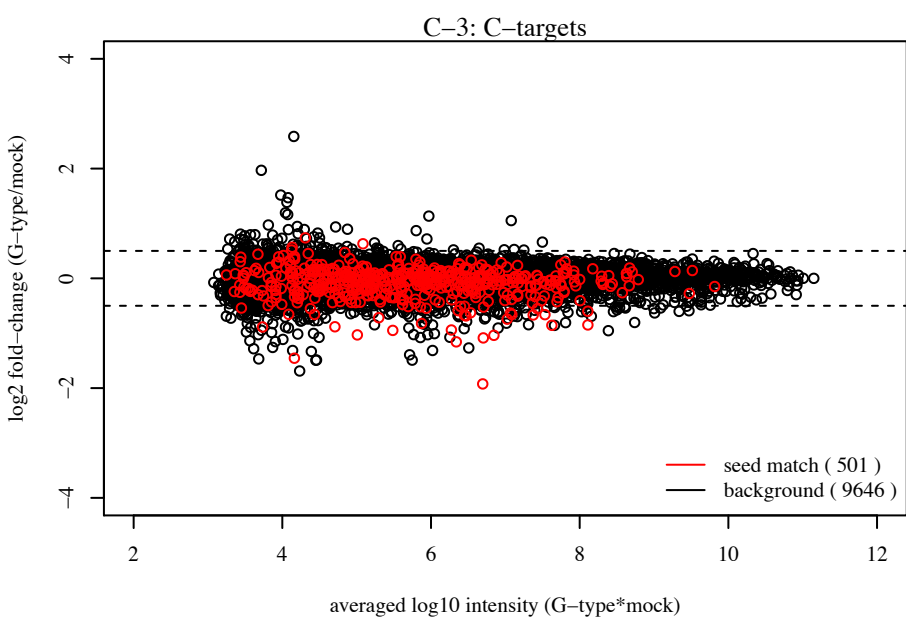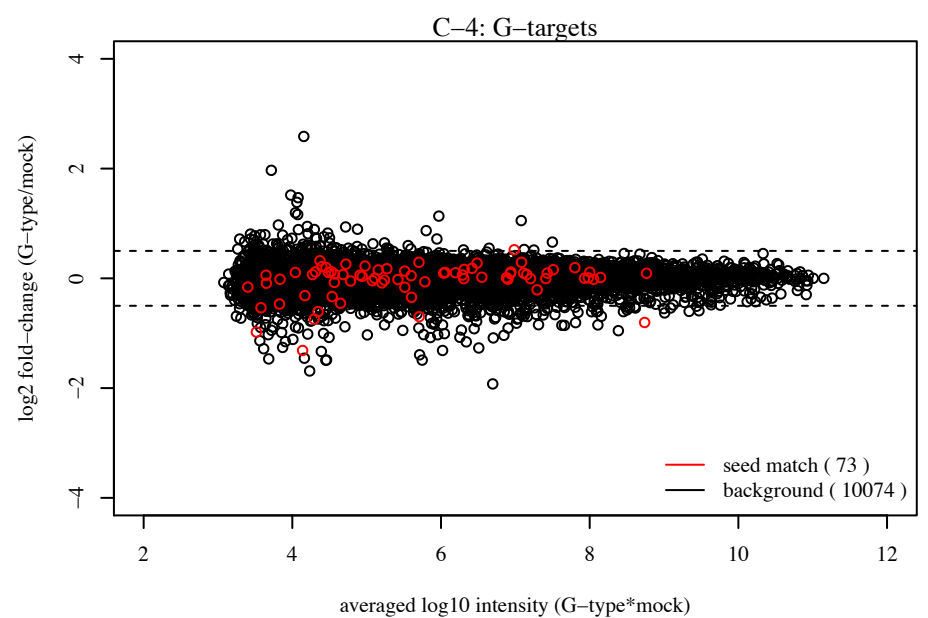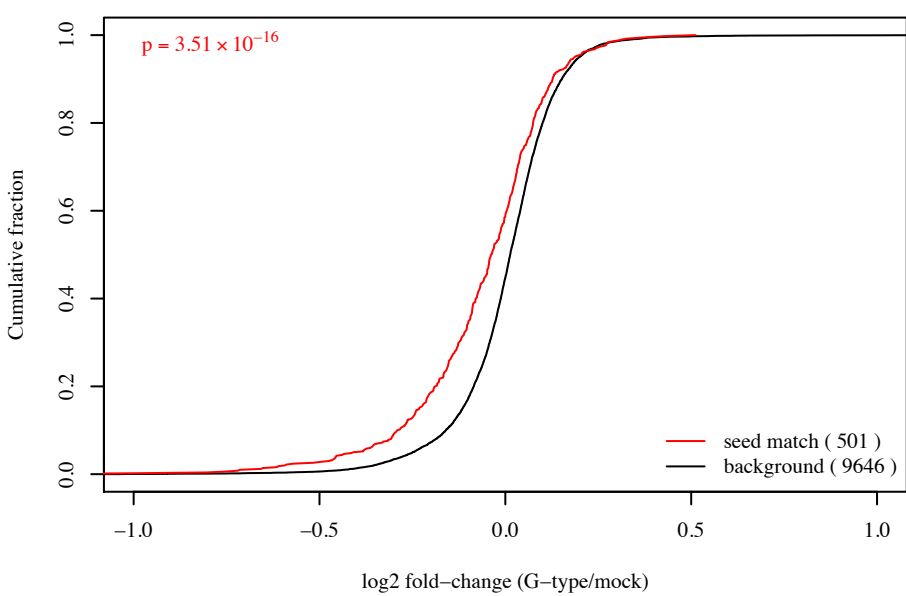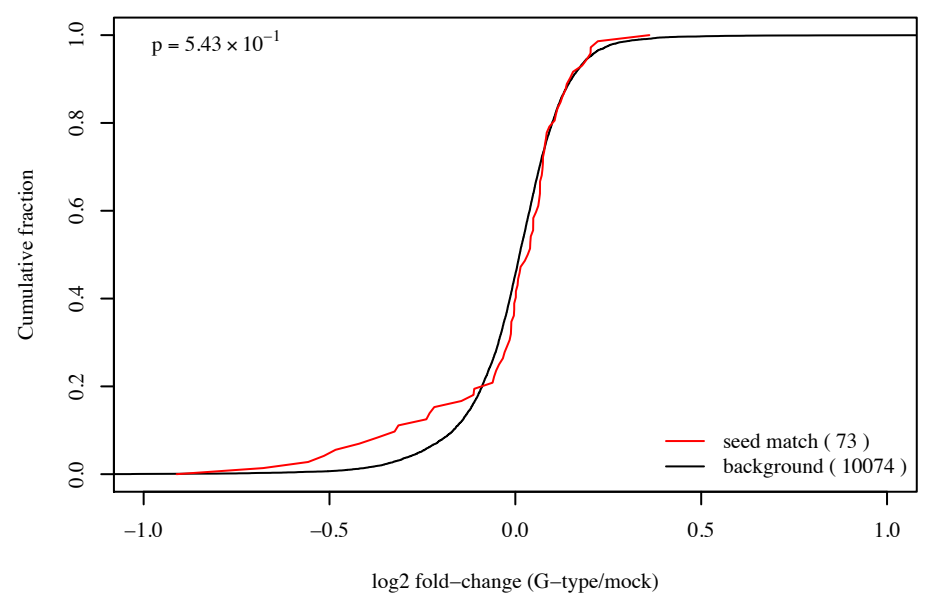

### Supplementary Figure S1.

#### Microarray-based profiling of transcripts downregulated by miR-376a-2 duplexes.

Microarray profiles of the transcripts by the transfection of wild-type (A-type) (A), I-type (B), or G-type (C) miR-376a-2 duplex into HeLa cells 24 hr after transfection. The expression profiles to each of U-targets (A-1, B-1, C-1), A-targets (A-2, B-2, C-2), C-targets (A-3, B-3, C-3), or G-targets (A-4, B-4, C-4) are respectively shown. Upper panels showed MA plots, and lower panels showed cumulative distributions. In MA plot, the vertical axis indicates the changes in gene expression represented by the  $\log_2$  of fluorescence intensity normalized to that of the mock transfection sample, and the horizontal axis indicates the  $\log_{10}$  of fluorescence intensity multiplied by that of the mock transfection sample. The dotted lines indicate  $\log_2(\text{sample}/\text{mock}) = 0.5$  or  $-0.5$ . Red dots indicate unique seed-matched target transcripts, black dots, background transcripts. In the cumulative distribution, the vertical axis indicates the cumulative fraction of seed-matched (red) or background (black) transcripts, and the horizontal axis indicates the  $\log_2$  of fluorescence intensity normalized to that of the mock transfection sample. (A)-(C) The difference in distribution between the seed-matches and their respective backgrounds was estimated using Wilcoxon's rank-sum test. Significant values ( $p < 0.01$ ) are shown in red.

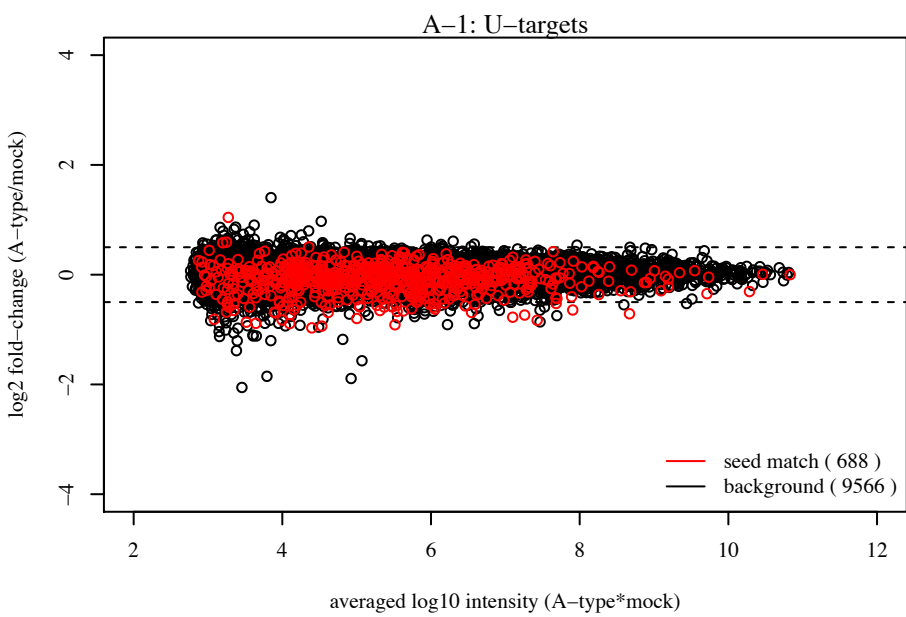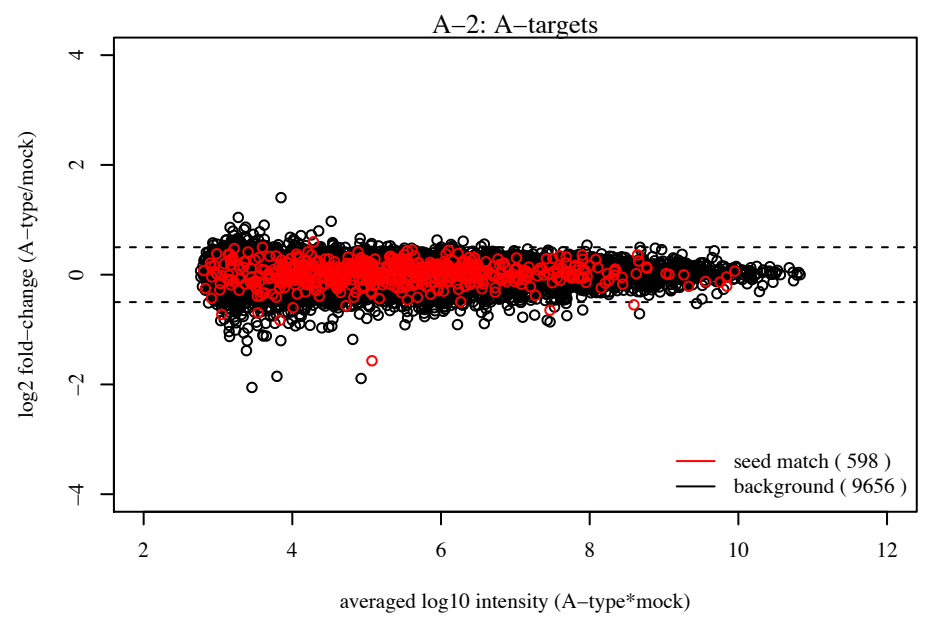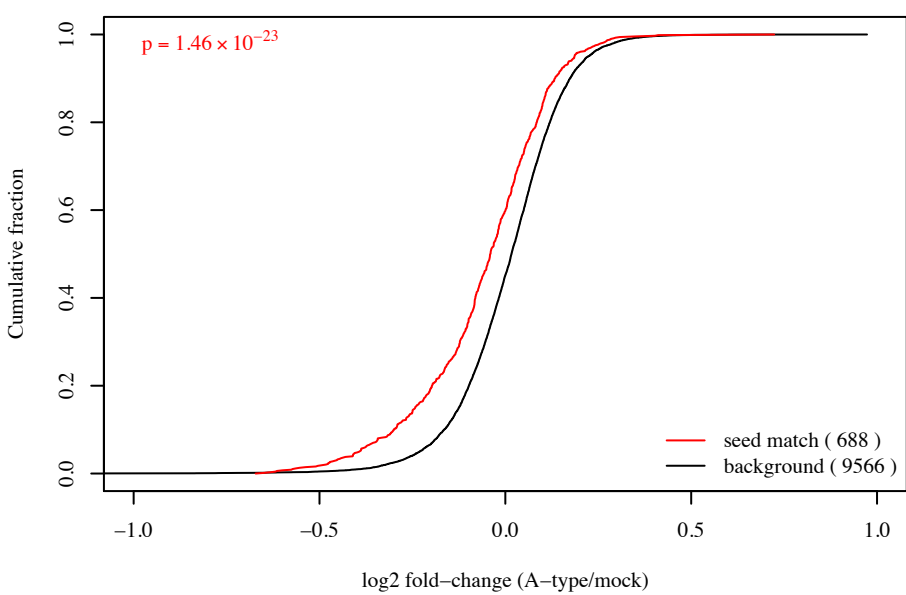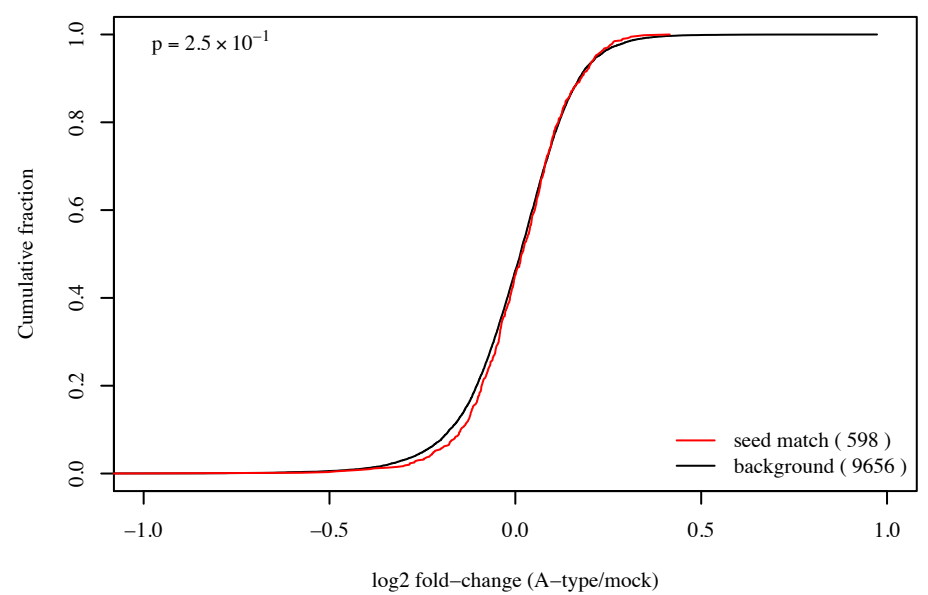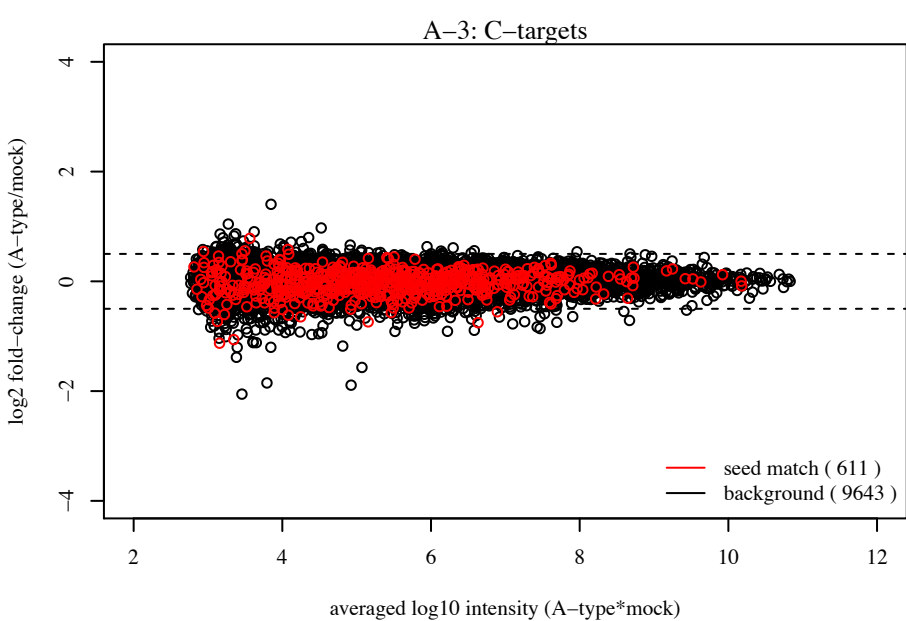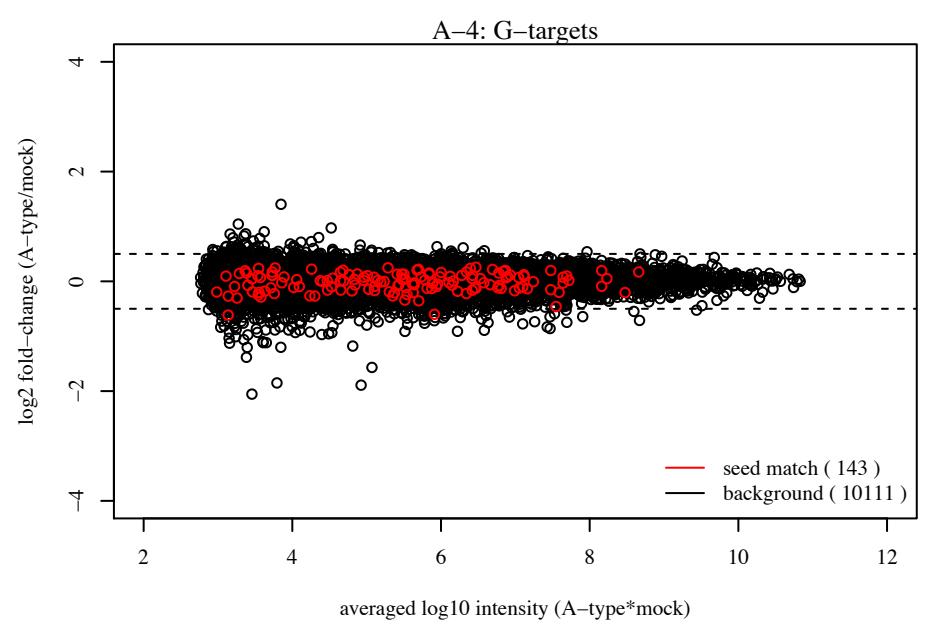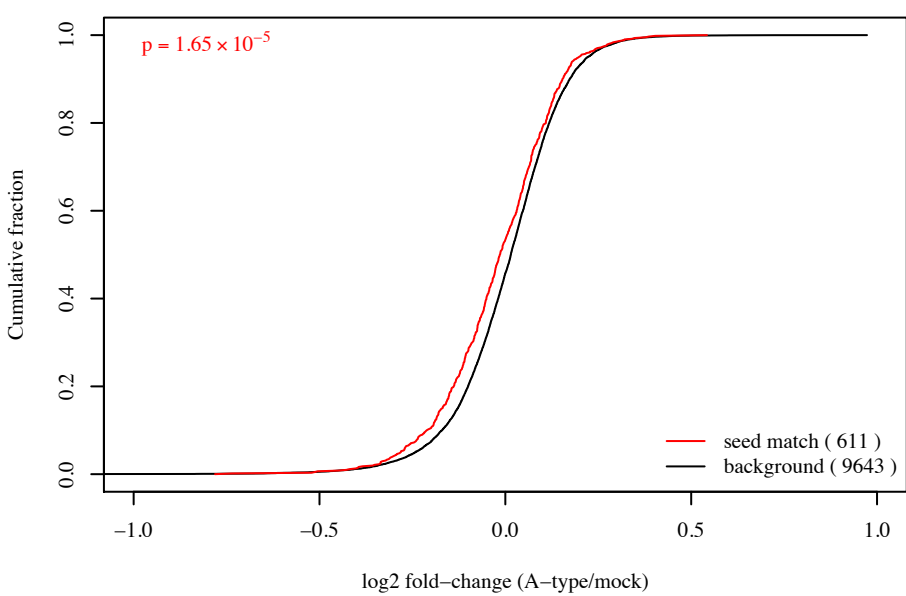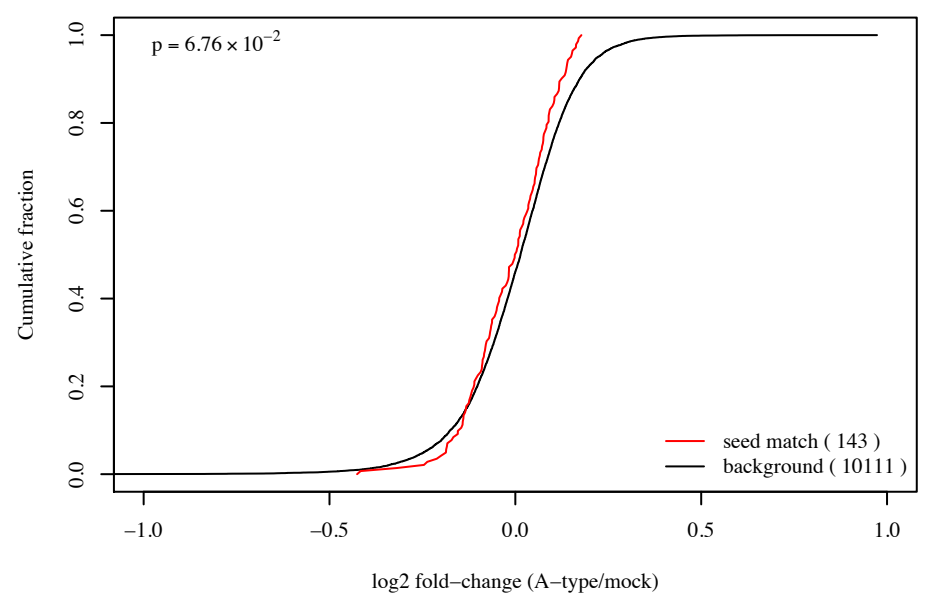

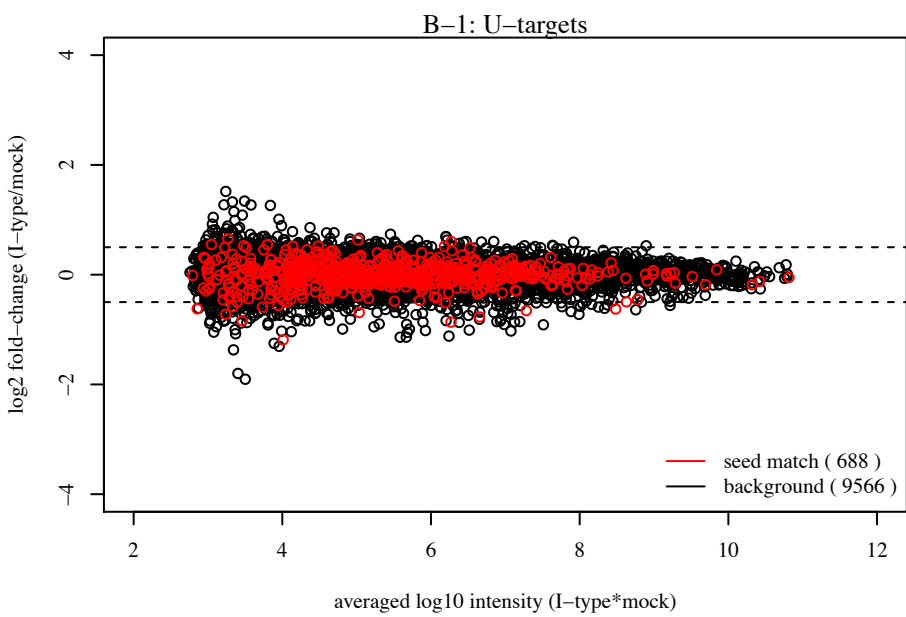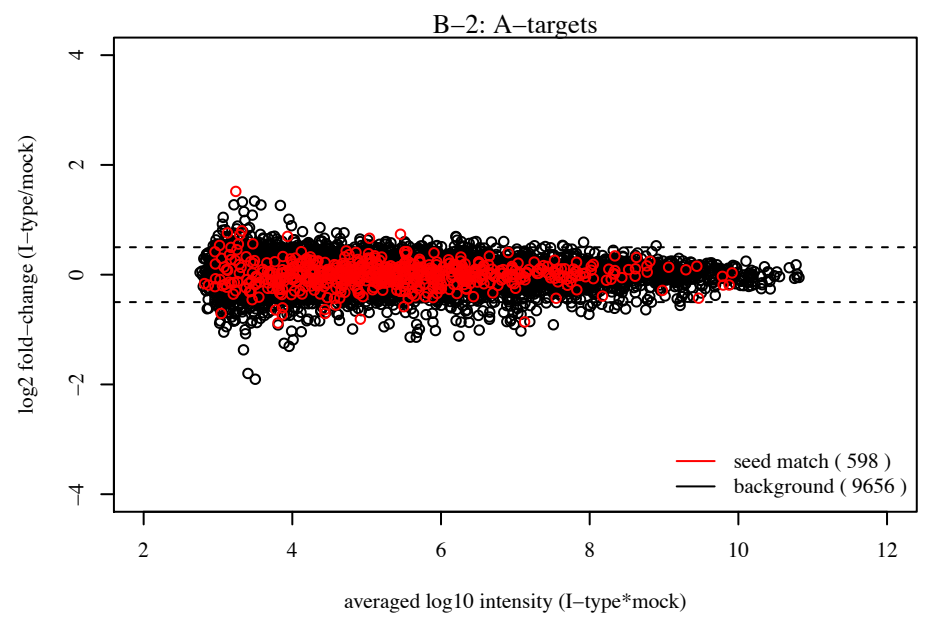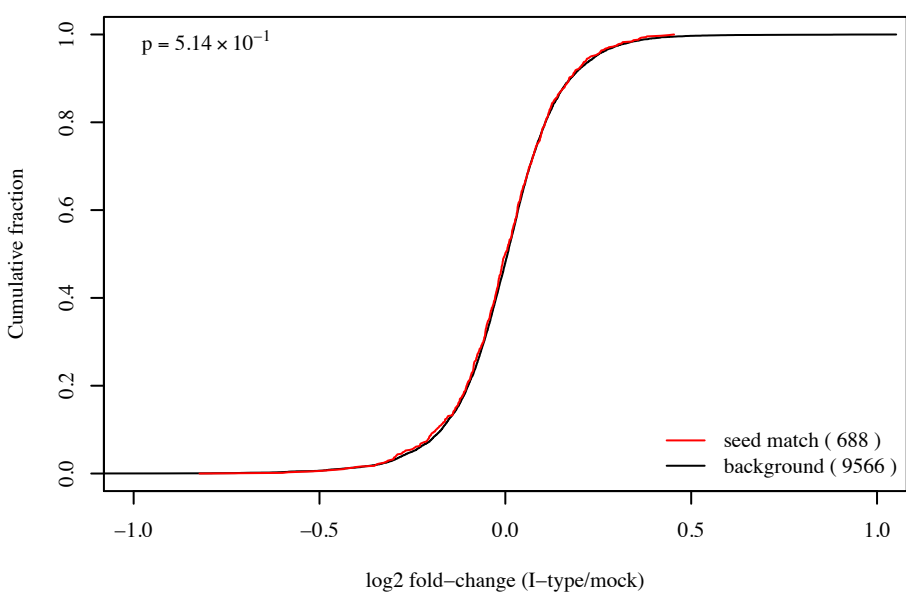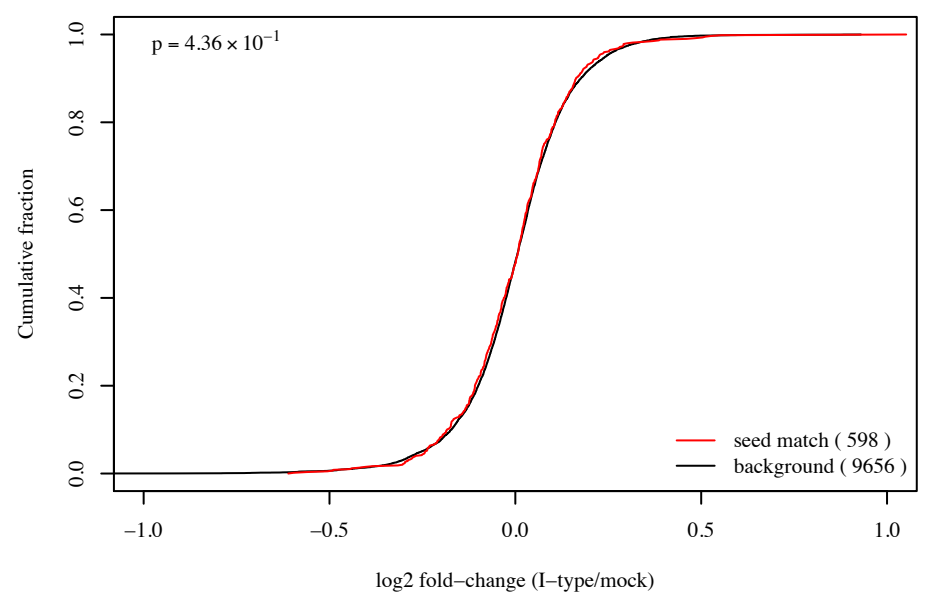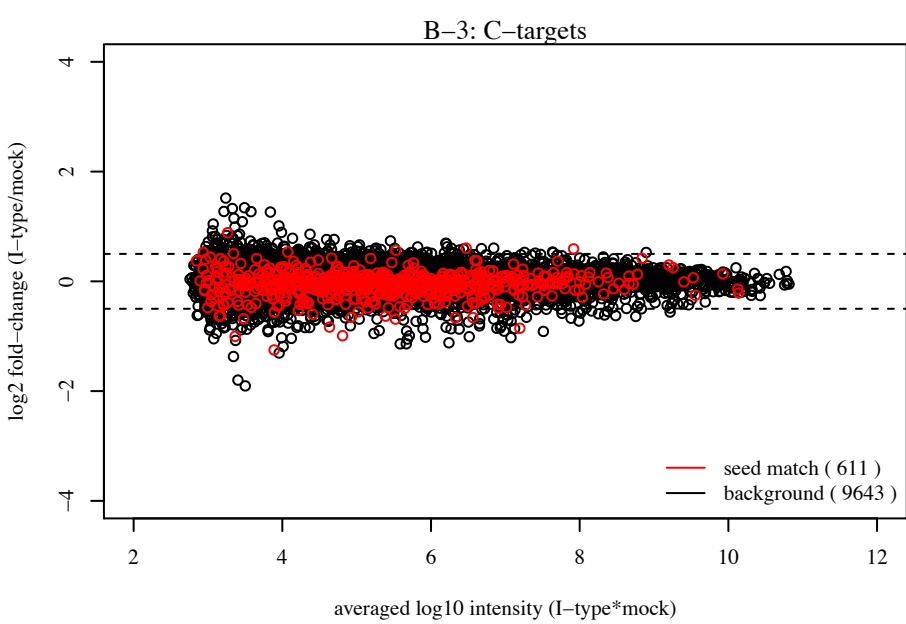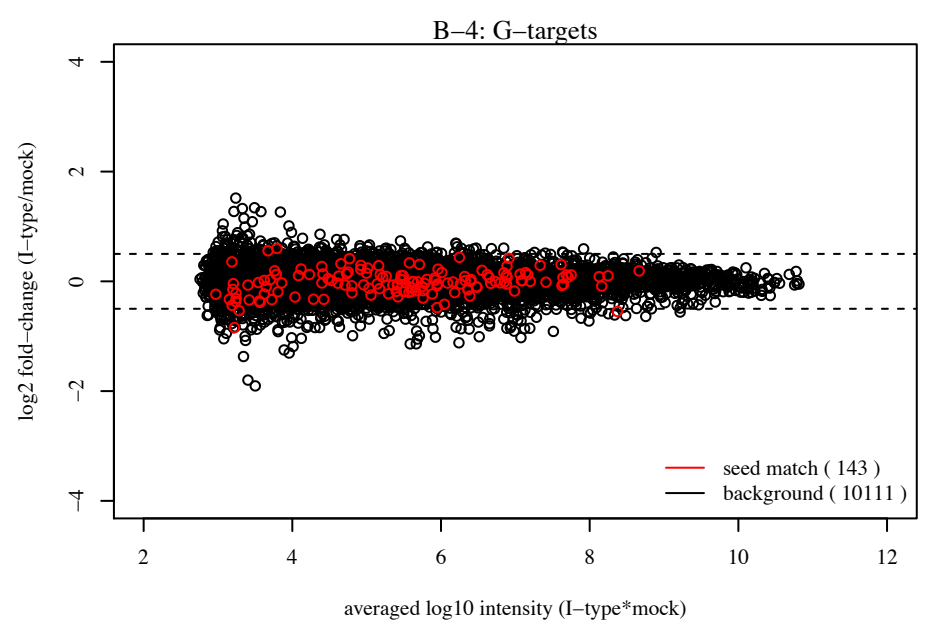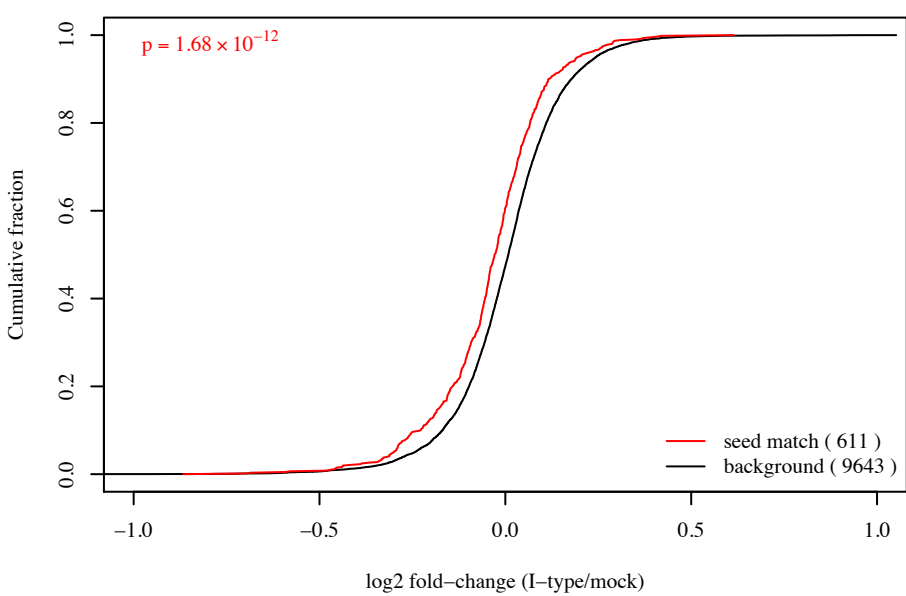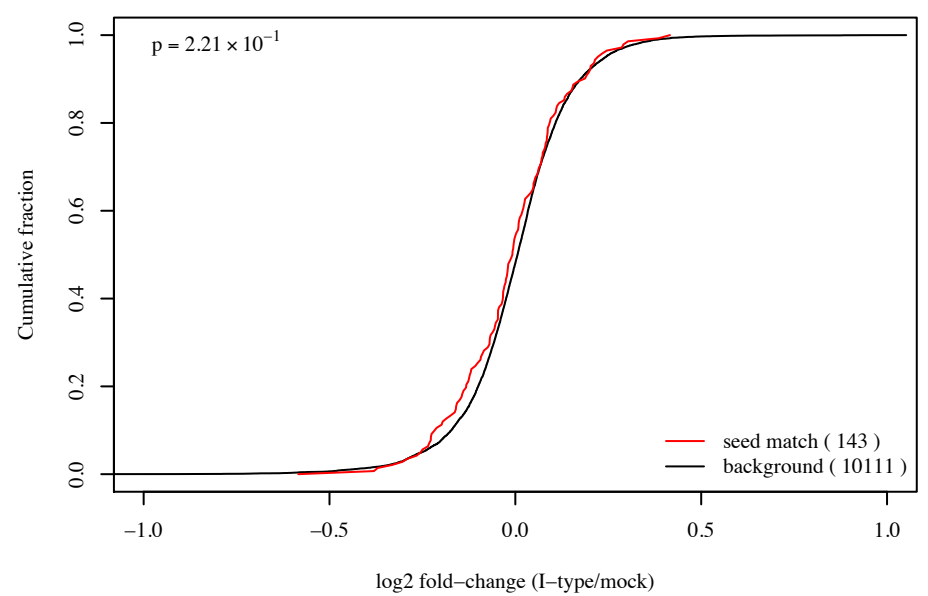

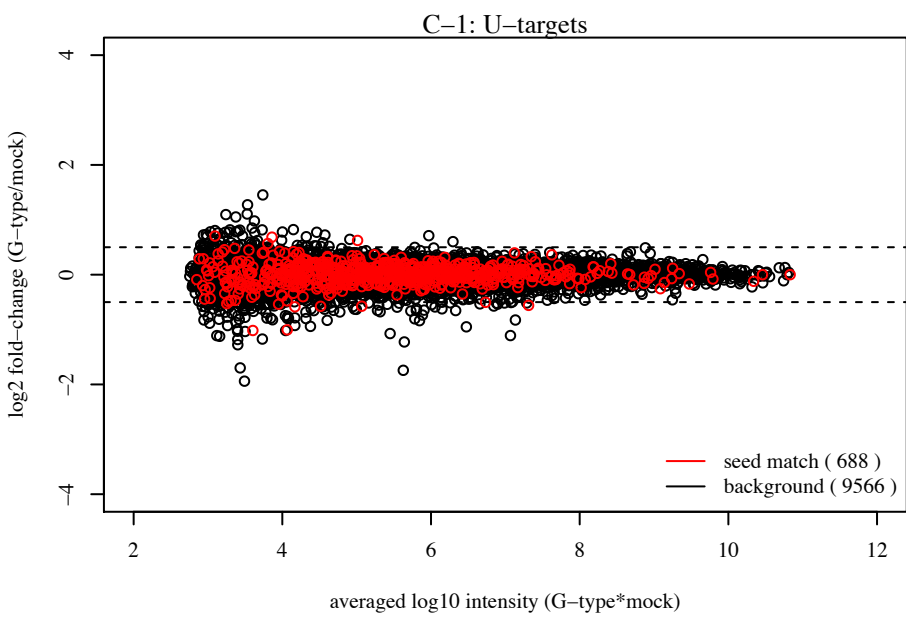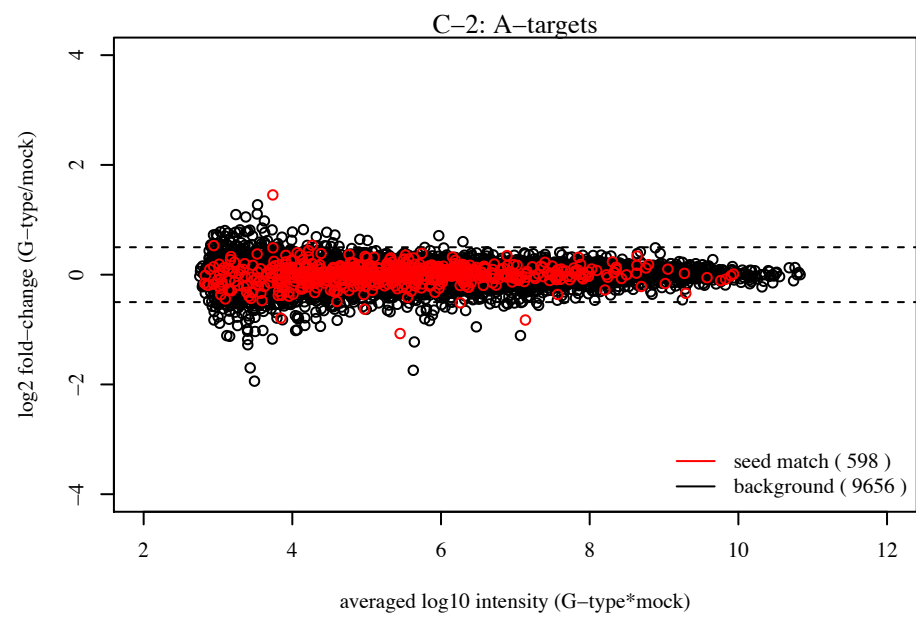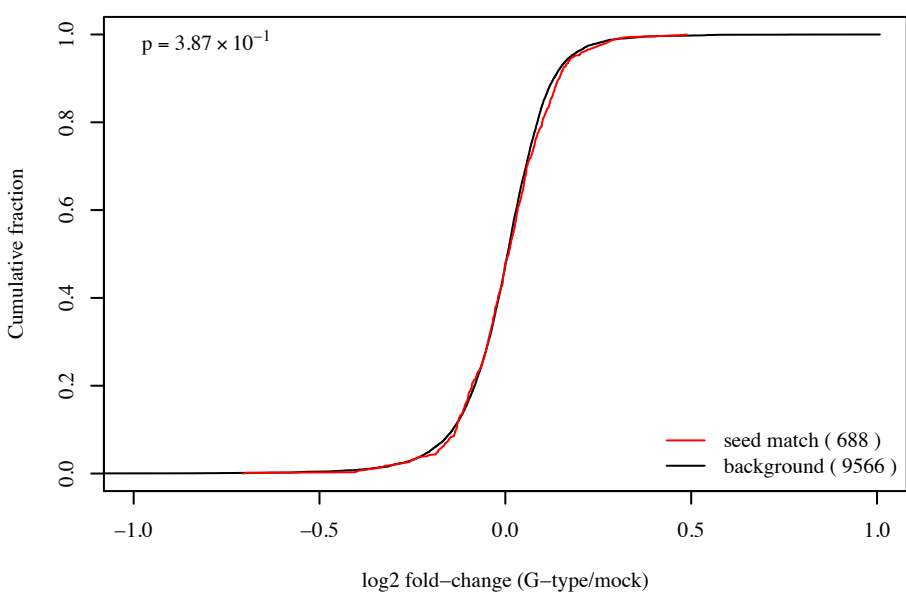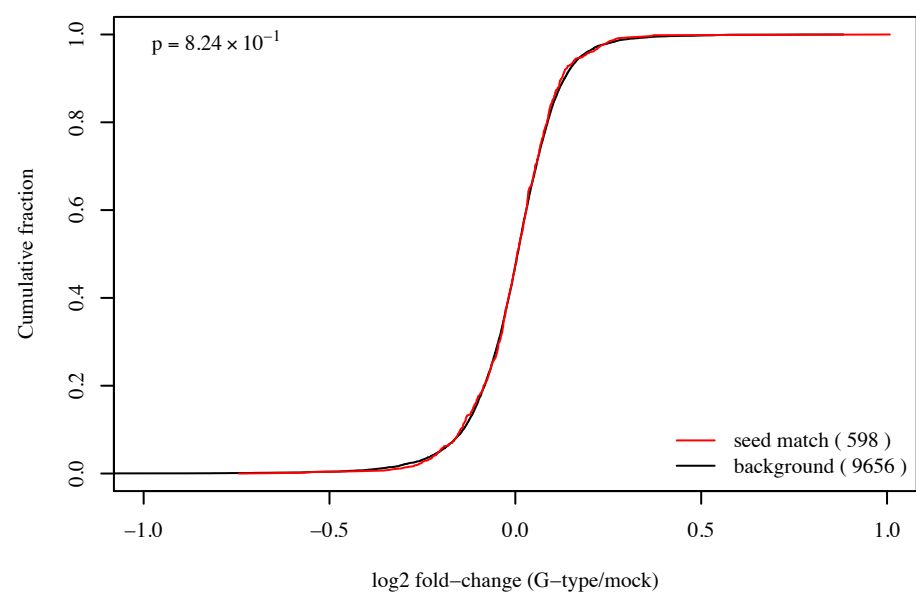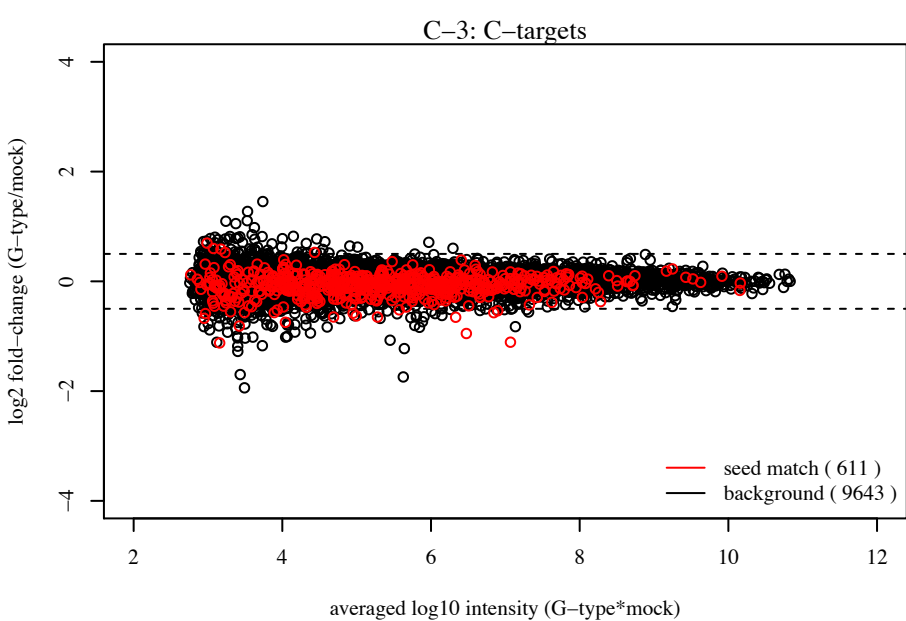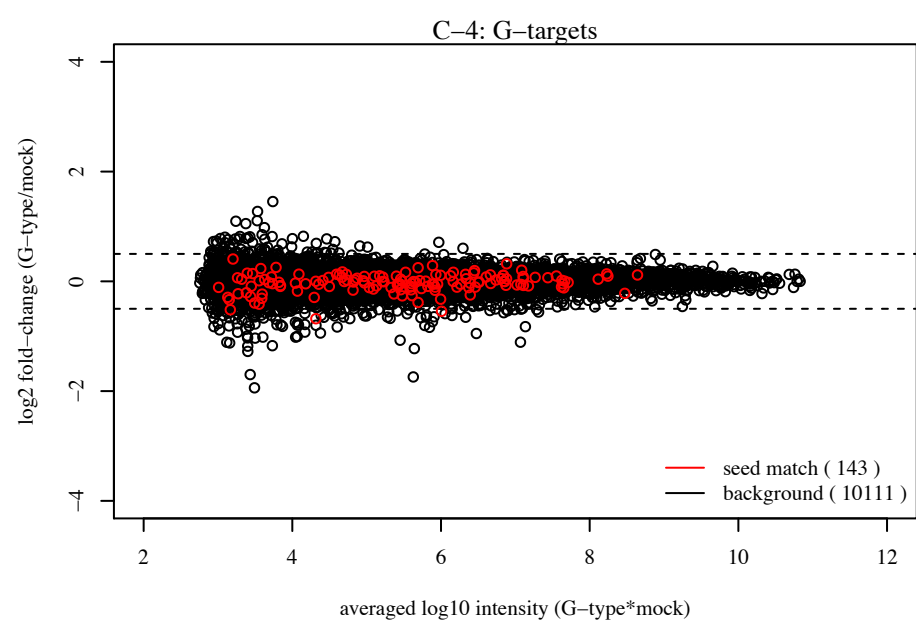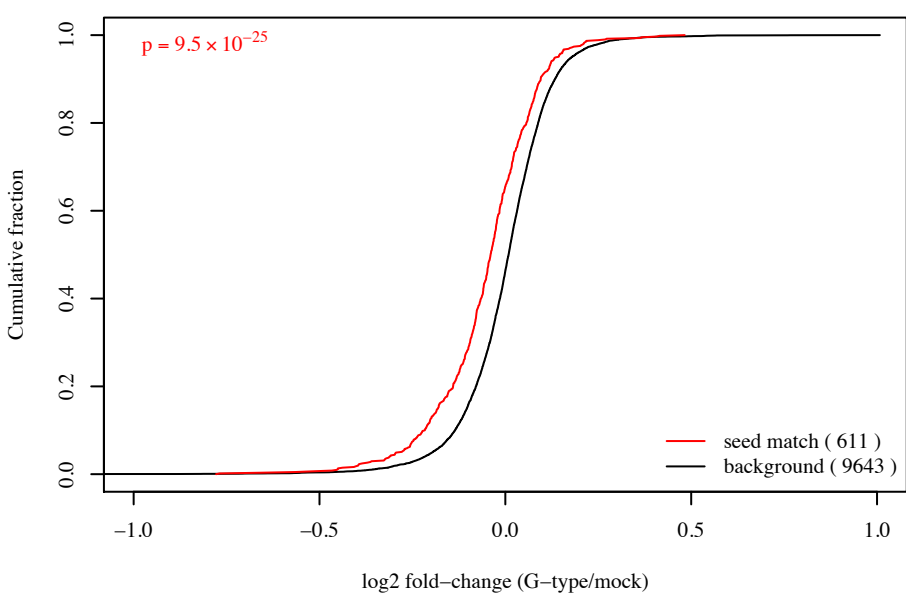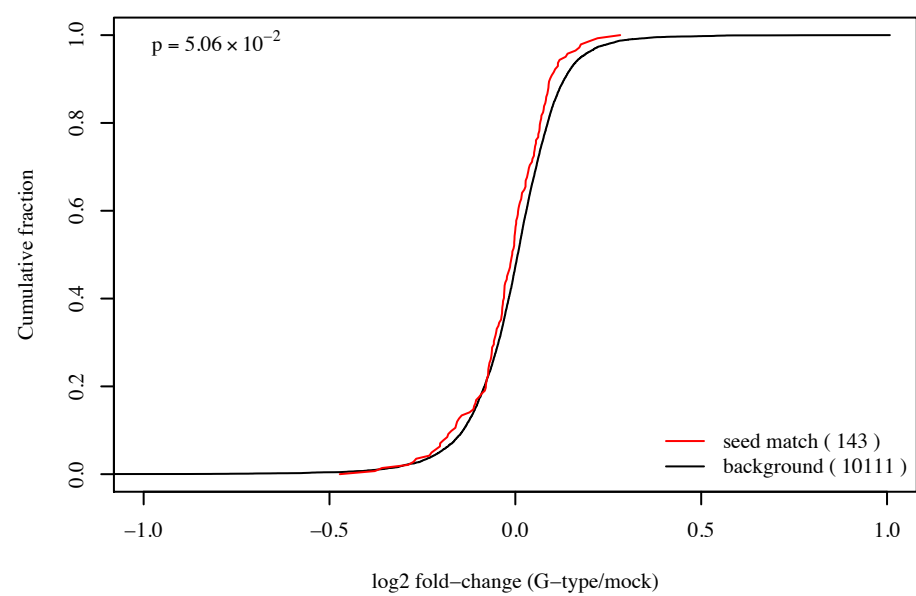

**Supplementary Figure S2.**

**Microarray-based profiling of transcripts downregulated by miR-22 duplexes.**

Microarray profiles of the transcripts by the transfection of wild-type (A-type) (A), I-type (B), or G-type (C) miR-22 duplex into HeLa cells 24 hr after transfection. Detailed descriptions about this Figure are the same as in Supplementary Figure S1.



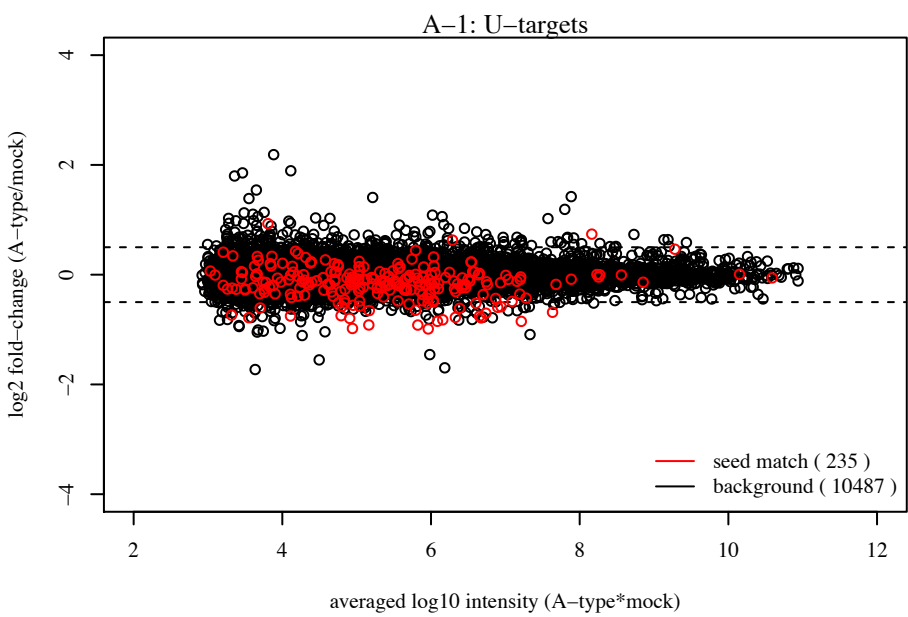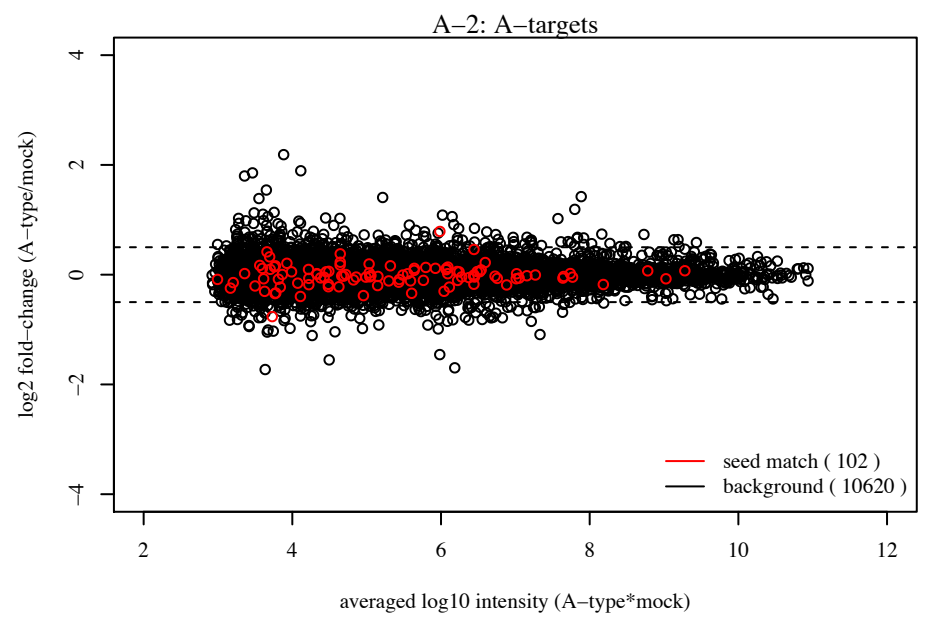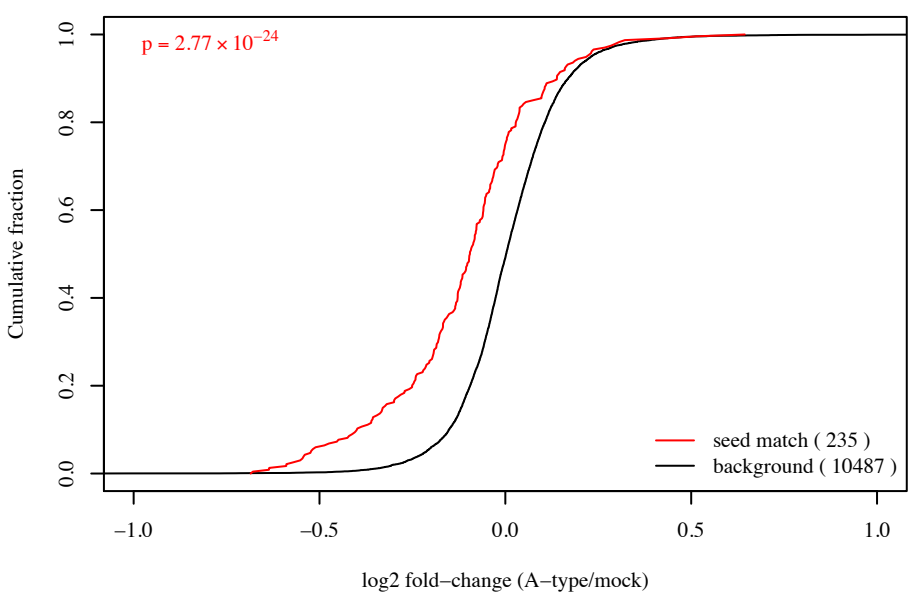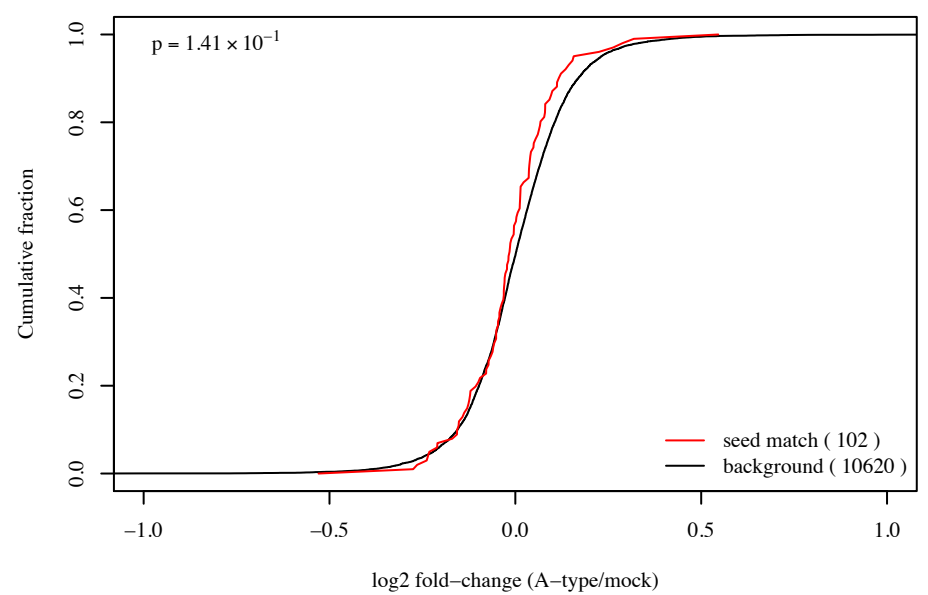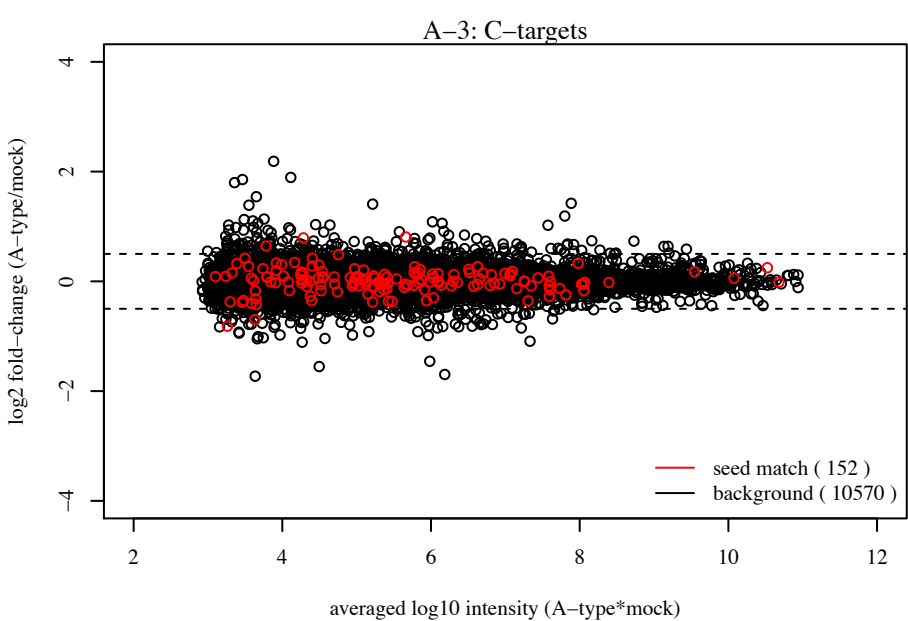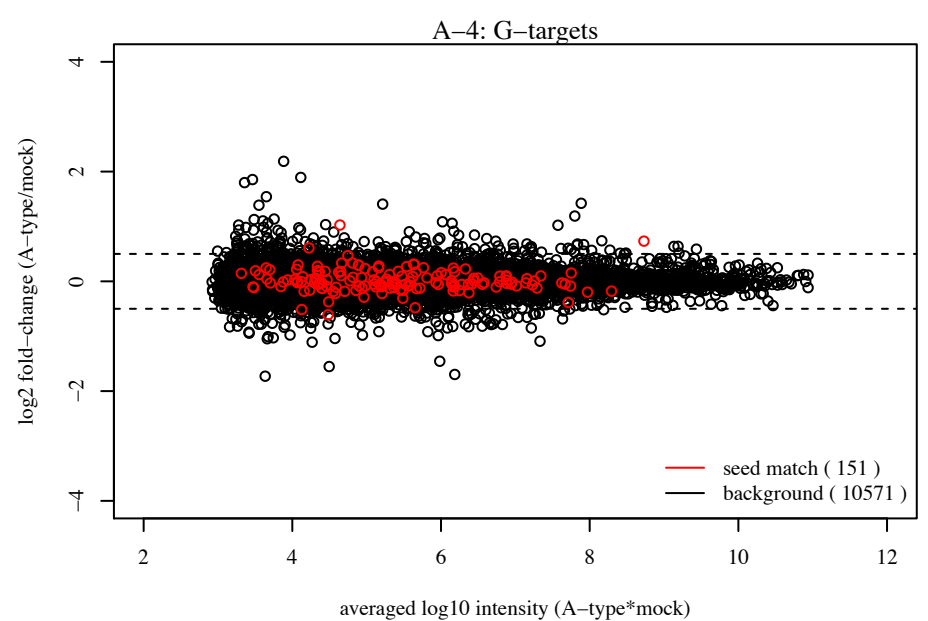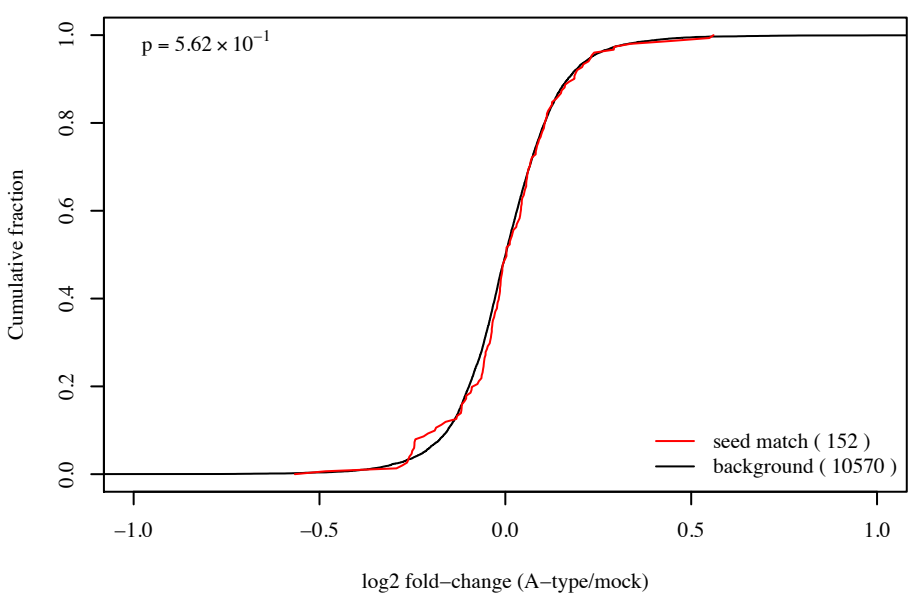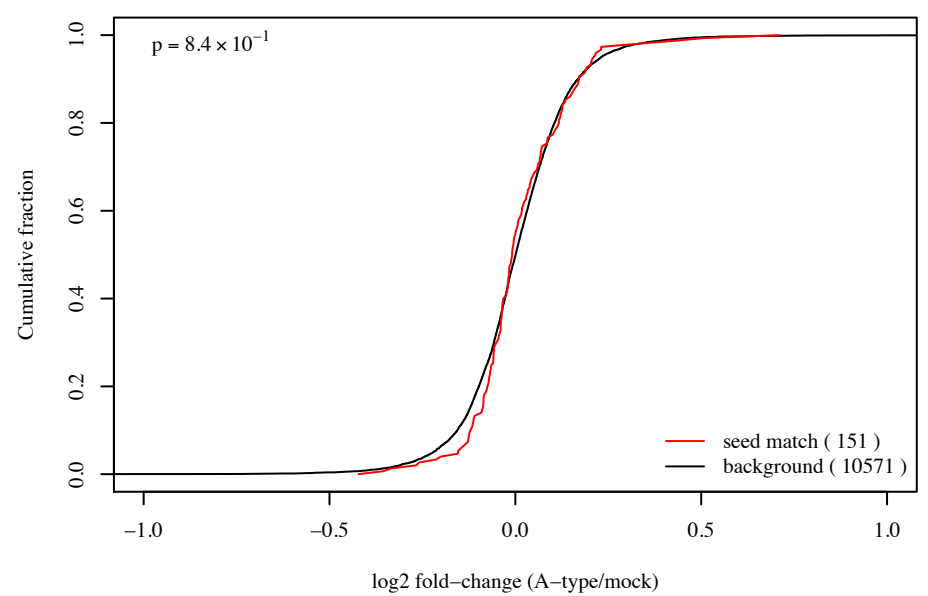

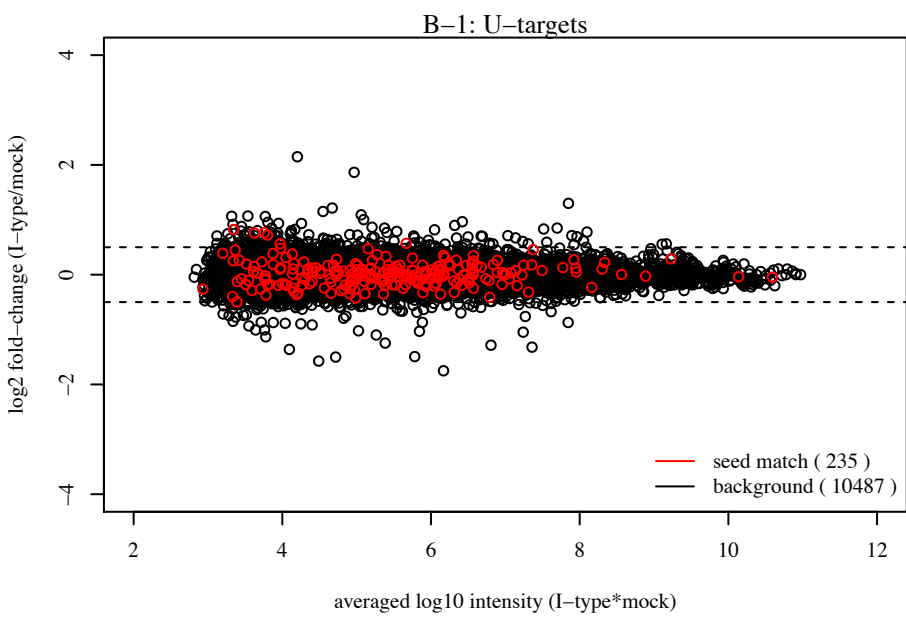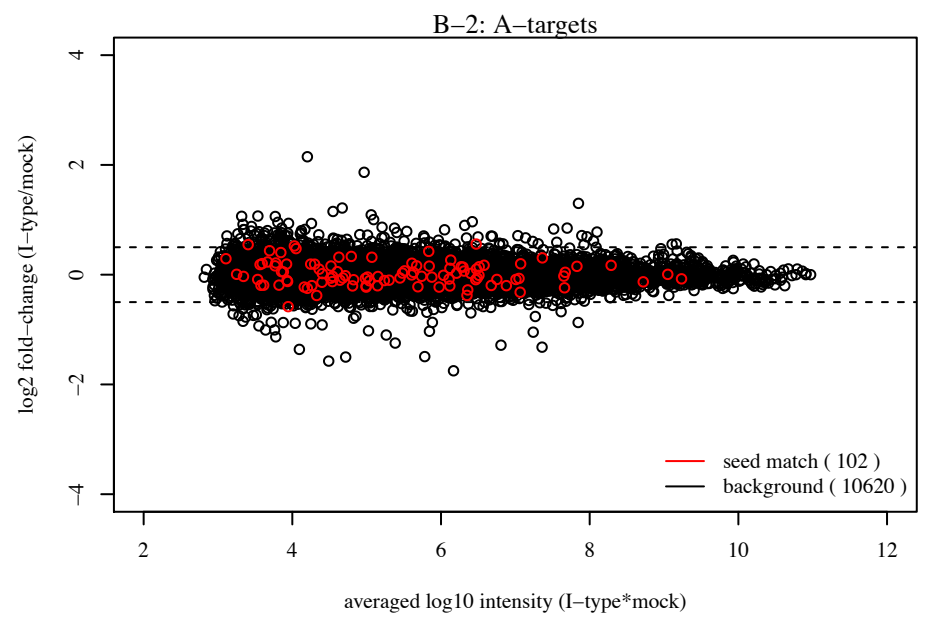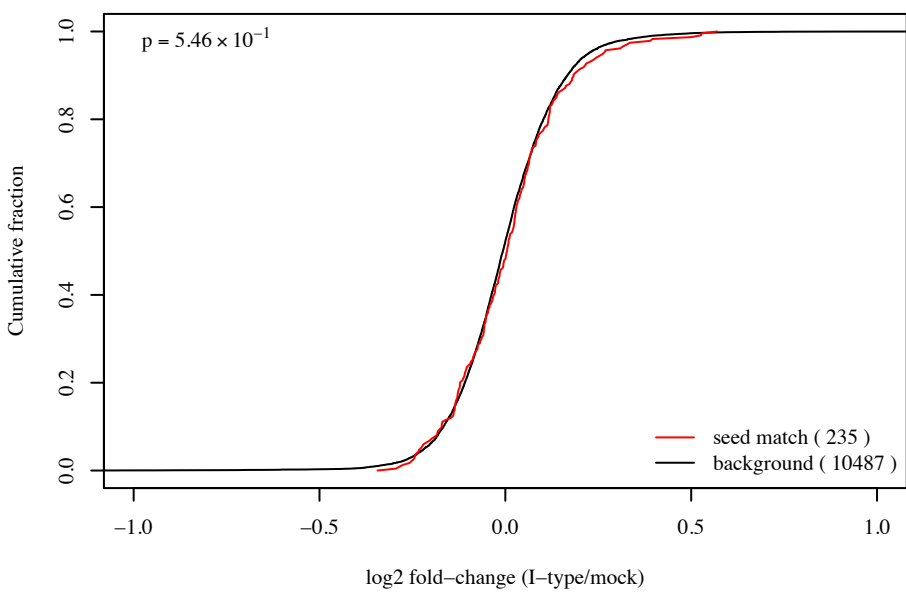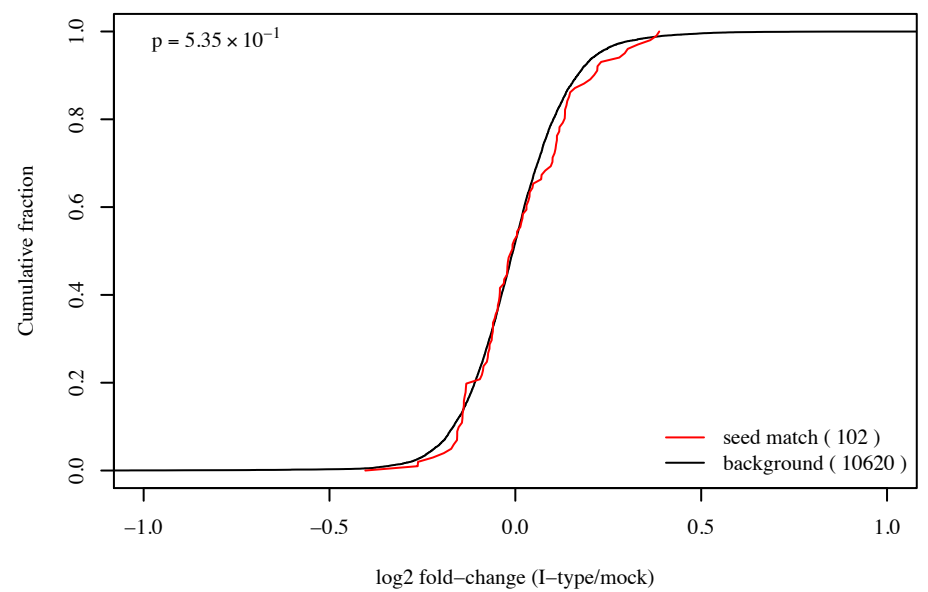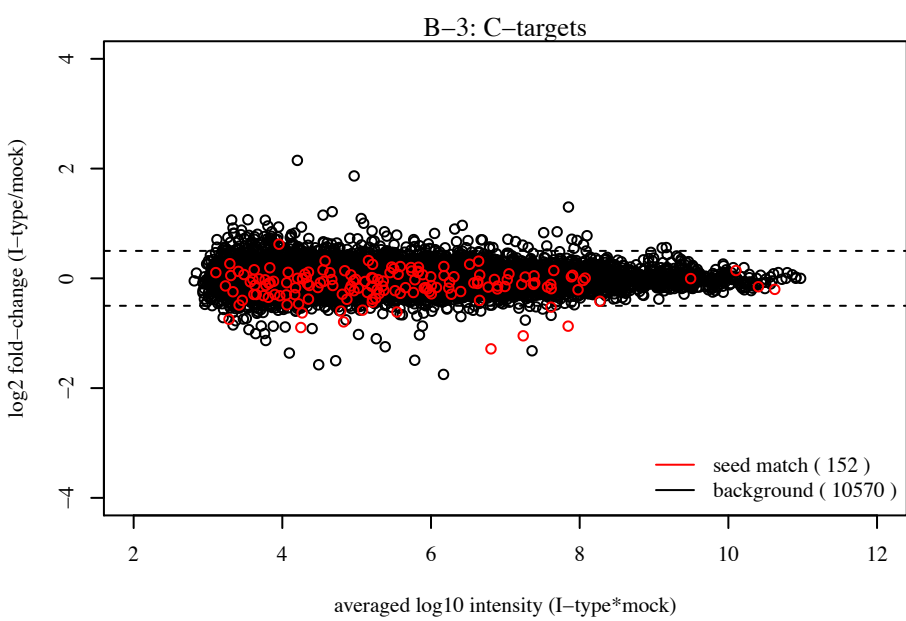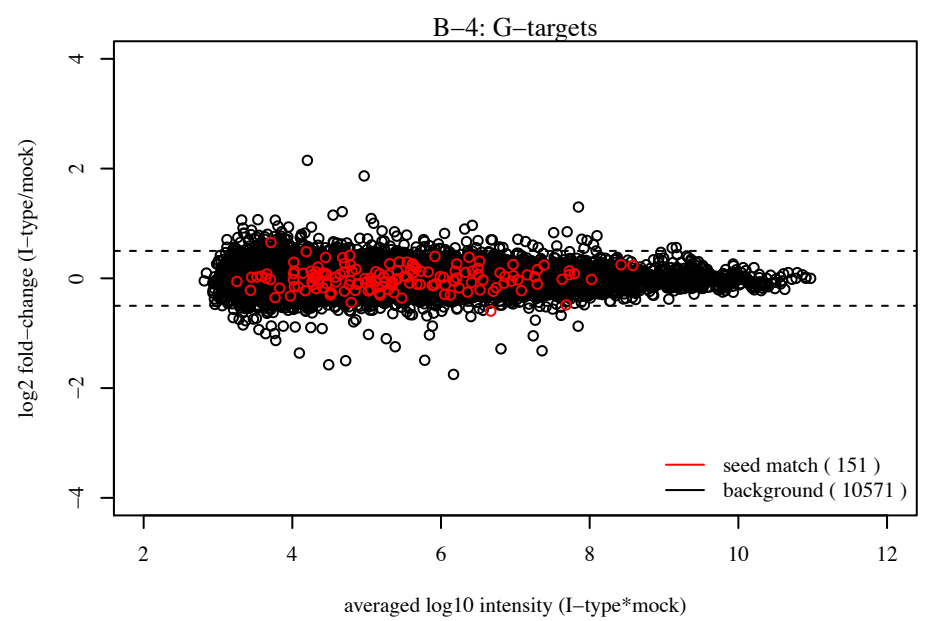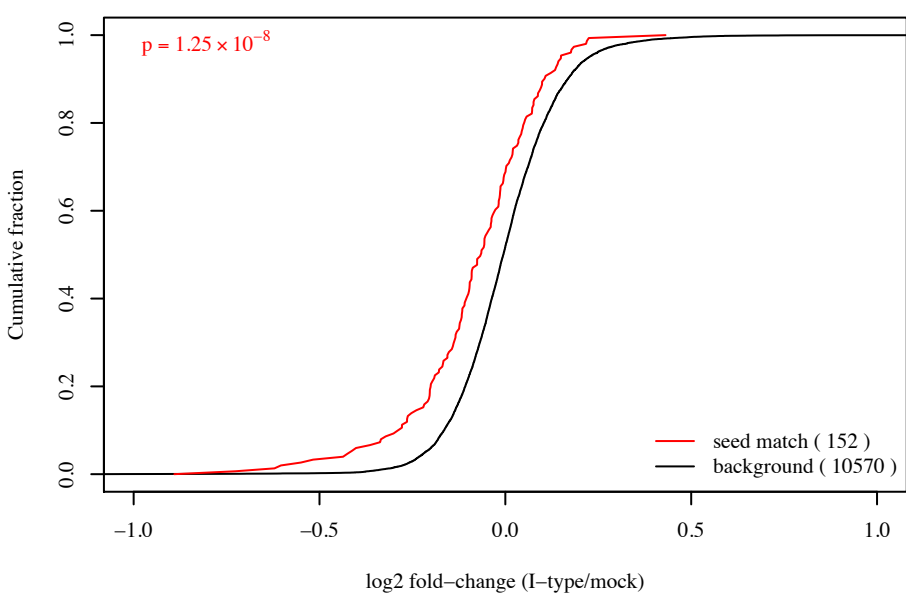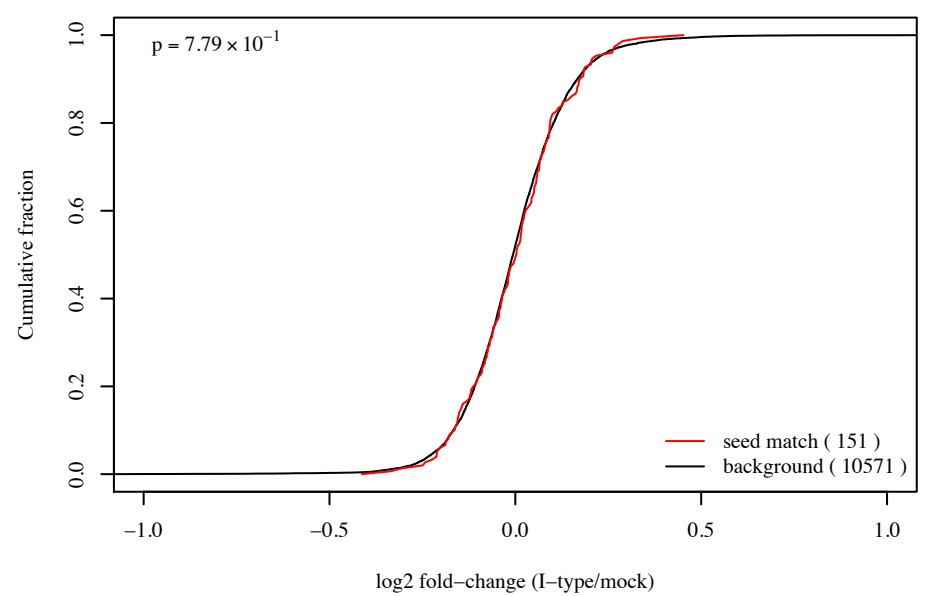

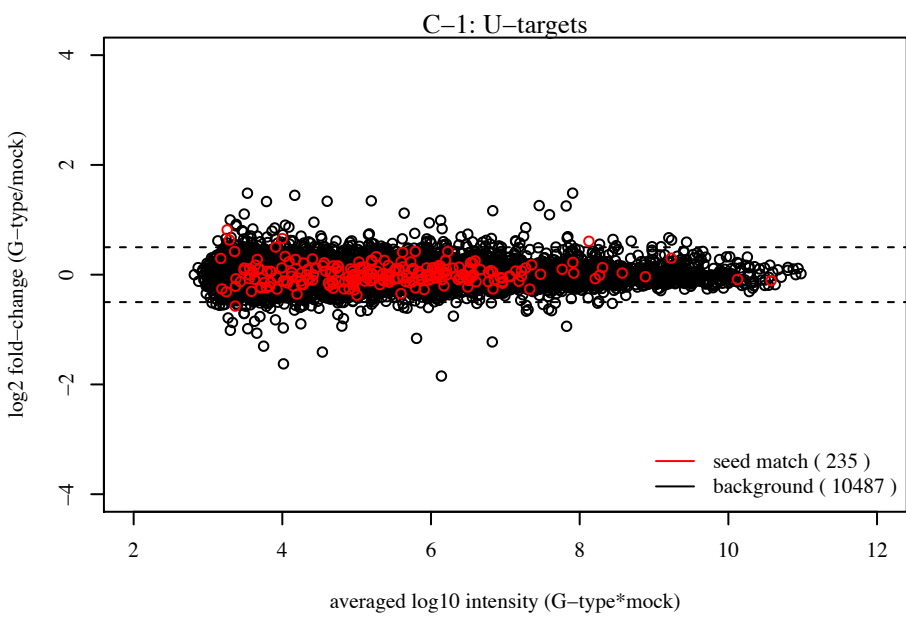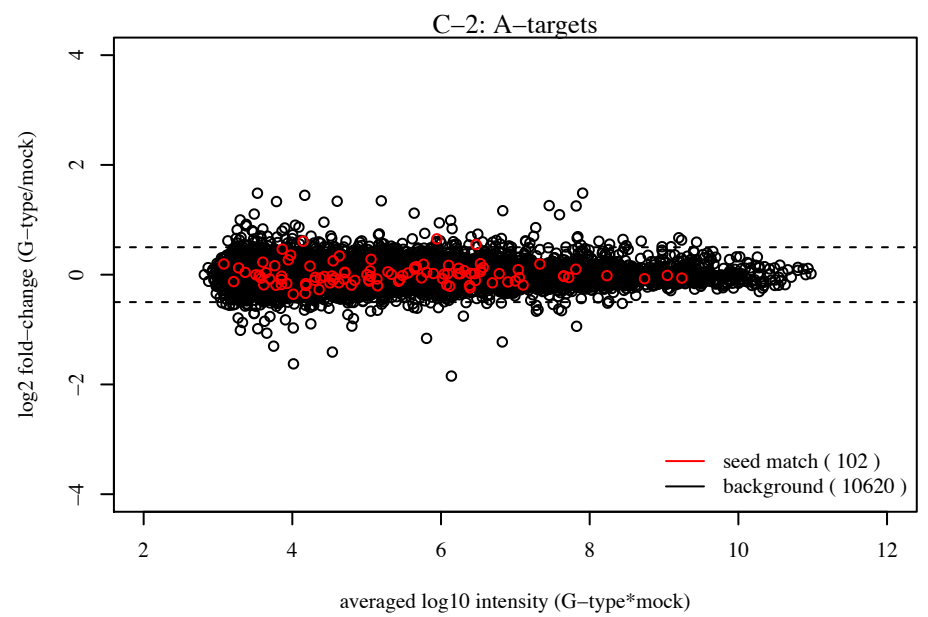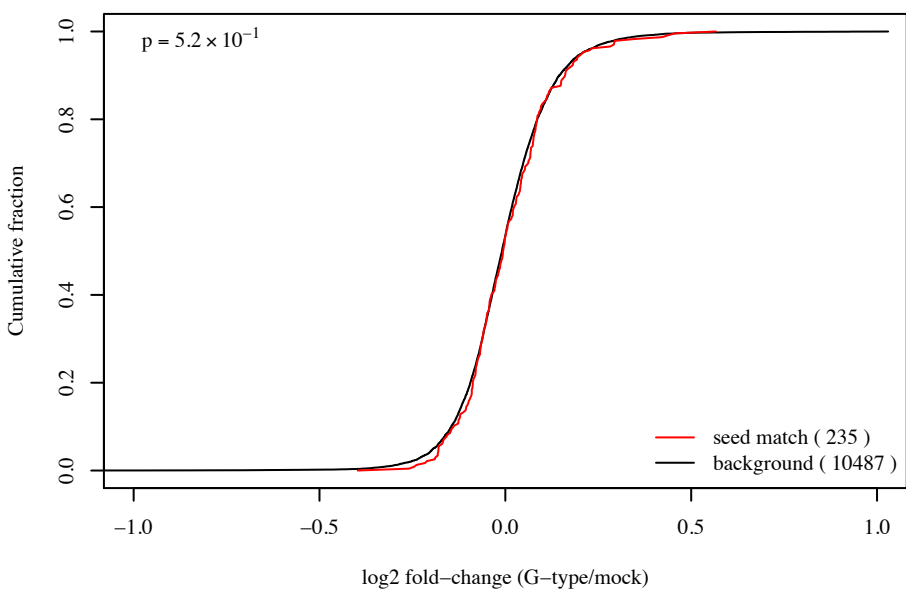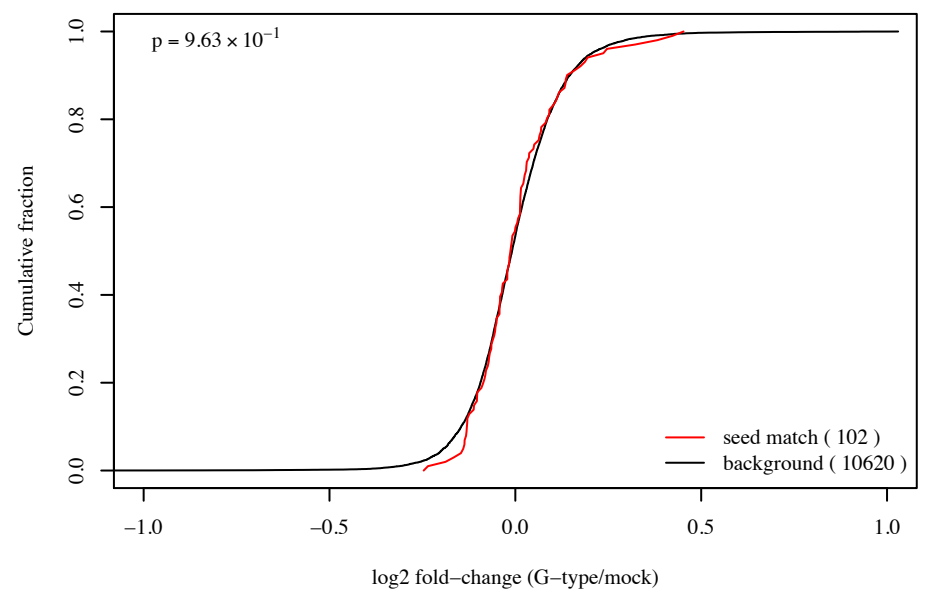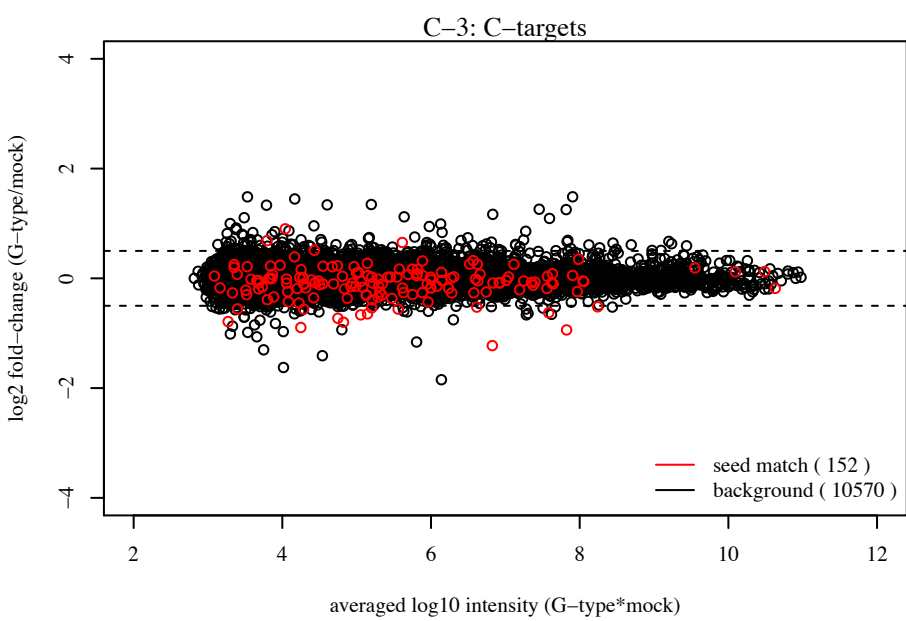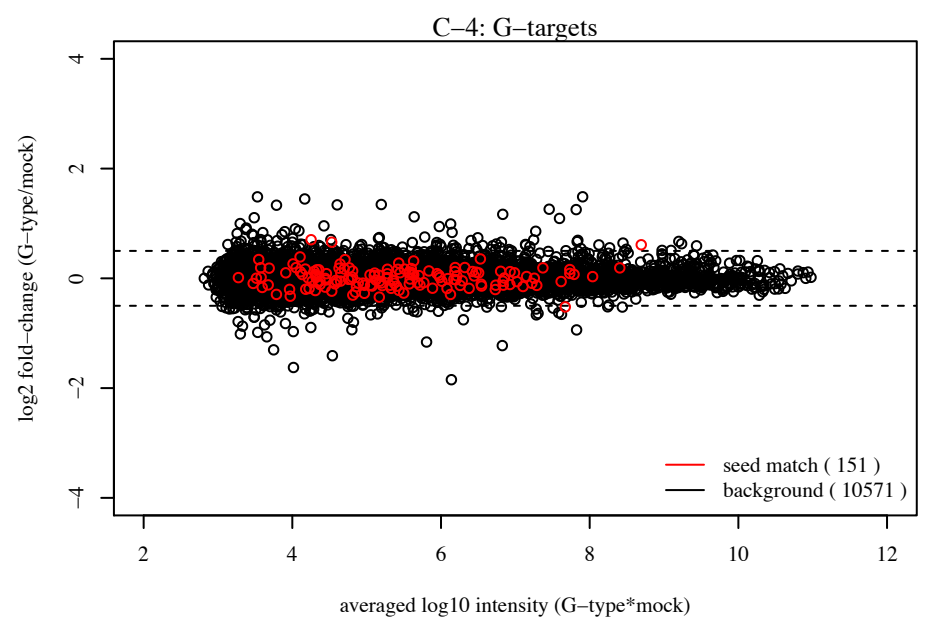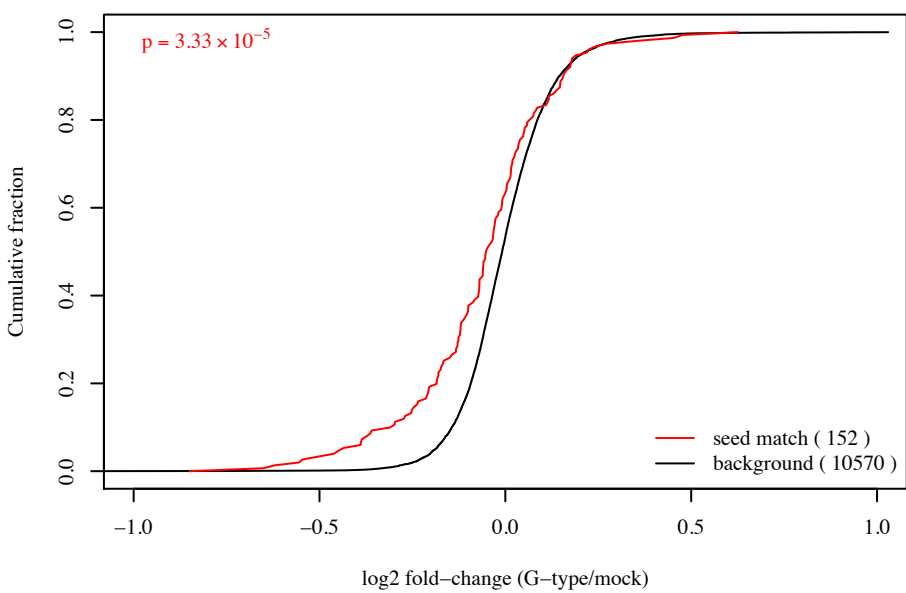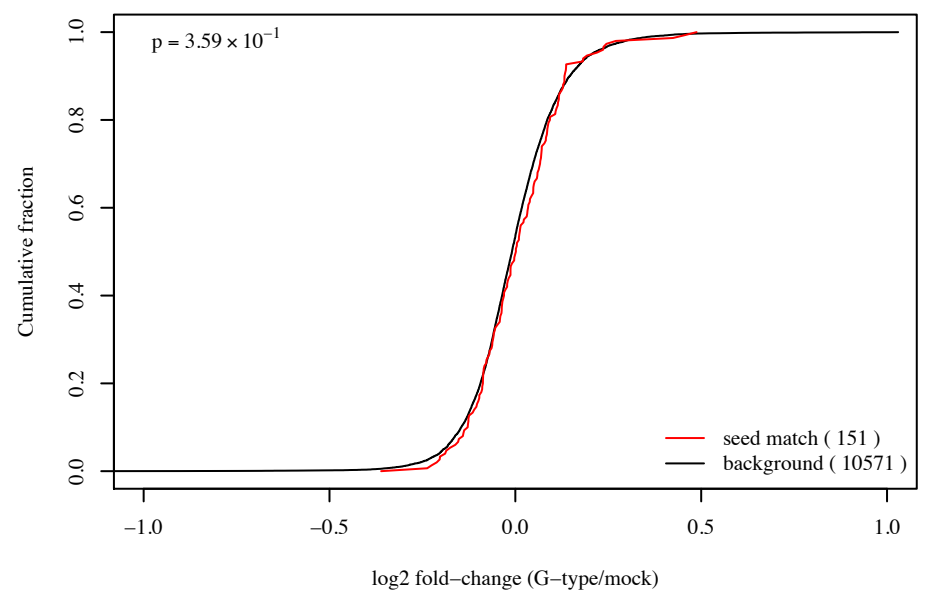

**Supplementary Figure S3.**

**Microarray-based profiling of transcripts downregulated by miR-191 duplexes.**

Microarray profiles of the transcripts by the transfection of wild-type (A-type) (A), I-type (B), or G-type (C) miR-191 duplex into HeLa cells 24 hr after transfection. Detailed descriptions about this Figure are the same as in Supplementary Figure S1.

## Supplementary Figure. S4.

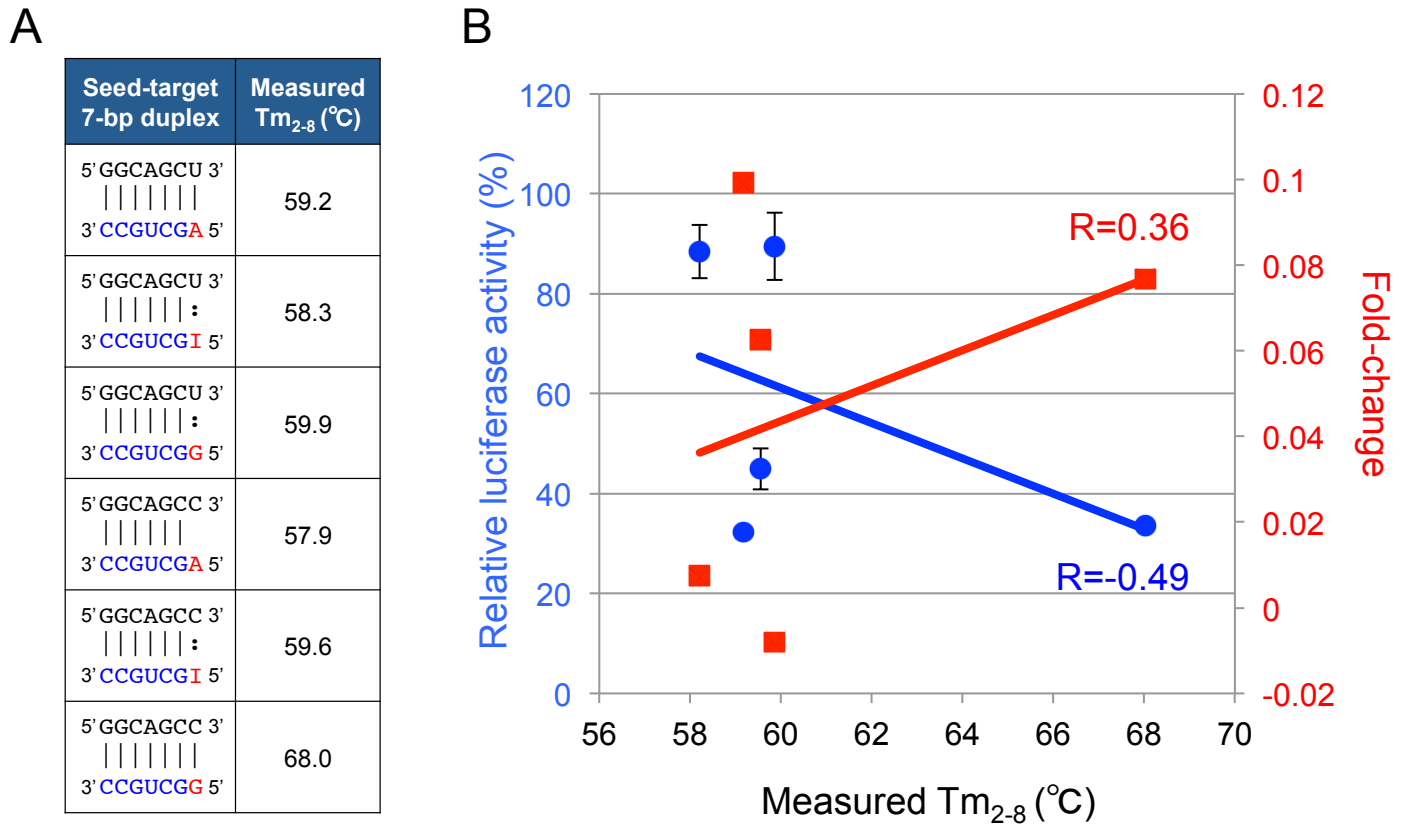

**Supplementary Figure S4. Correlations between  $T_m$  values of 7-bp seed-target duplexes and differential fold-changes of expression levels of target transcripts determined by microarray experiments or relative luciferase activities determined by reporter assays.**

(A) The duplex structures formed between 7-mer seed sequence of miR-22-3p containing adenosine, inosine, or guanosine in the possible editing site and target mRNA sequence with uridine or cytidine at the opposite site of editing position, and the measured  $T_m$  values of these 7-bp duplexes.

(B) The correlations between the 7-bp  $T_m$  values and fold-changes in the expression levels of target mRNAs containing seed complementary sequences in their 3'-UTRs (red), or relative luciferase activities at 50 nM of miRNA duplex (blue). The correlation coefficient ( $R$ ) between  $T_m$  values and differential fold-changes was 0.36, and  $R$  between  $T_m$  values and relative luciferase activities was -0.49.

**Supplementary Table S1: List of PCR primers**

| gene name | accession number | Forward primer(5'→3')    | Reverse primer(5'→3')   |
|-----------|------------------|--------------------------|-------------------------|
| SEL1L3    | NM_015187        | TGTCTCAGCAAGCGATCCCC     | CCACGTGGCTCCGGGTTATT    |
| RAD23A    | NM_005053        | CACGGAAGCAGCAGGAGAGAACC  | CAGGGGGCTCGTTCAGCATCT   |
| CKAP4     | NM_006825        | GCAGCCACCAGGACTTCTCC     | GACTGCACCTTCTGCTCGACG   |
| SLC7A1    | NM_003045        | AGCGTCCGTTGGTCCTTGAG     | GGAAGGTTTCAGAATCCAAGCCG |
| TTYH3     | NM_025250        | CTCATCCGCAGCTCCAAGGG     | GCAGGATGTCCCCACTCAGC    |
| EPS15     | NM_001981        | AAAAACGTGGGTTGTATCCCCTGC | TCACGGACCTCCAATCCAGACA  |

**Supplementary Table S2: Inserted oligonucleotide sequences for construction of CM- and SM-targets**

| Target                 | Sense strand :inserted oligonucleotide sequence (5'→3')                                 | Antisense strand :inserted oligonucleotide sequence (5'→3')                          |
|------------------------|-----------------------------------------------------------------------------------------|--------------------------------------------------------------------------------------|
| miR-376a-2-CM-U-target | tcgagACGTGGATTTTCCTCTATGATg                                                             | aattcATCATAGAGGAAAATCCACGTc                                                          |
| miR-376a-2-CM-C-target | tcgagACGTGGATTTTCCTCCATGATg                                                             | aattcATCATGGAGGAAAATCCACGTc                                                          |
| miR-376a-2-SM-U-target | tcgagTATGCTCGATTAGTCTATGAACCTATGC<br>TCGATTAGTCTATGAACCTATGCTCGATTAG<br>TCTATGAACCg     | aattcGGTTCATAGACTAATCGAGCATAGGTT<br>ATAGACTAATCGAGCATAGGTTTCATAGACTA<br>ATCGAGCATAc  |
| miR-376a-2-SM-C-target | tcgagTATGCTCGATTAGTCCATGAACCTATGC<br>TCGATTAGTCCATGAACCTATGCTCGATTAG<br>TCCATGAACCg     | aattcGGTTCATGGACTAATCGAGCATAGGTT<br>CATGGACTAATCGAGCATAGGTTTCATGGACT<br>AATCGAGCATAc |
| miR-22-CM-U-target     | tcgagACAGTTCTTCAACTGGCAGCTTg                                                            | aattcAAGCTGCCAGTTGAAGAAGCTGTc                                                        |
| miR-22-CM-C-target     | tcgagACAGTTCTTCAACTGGCAGCCTg                                                            | aattcAGGCTGCCAGTTGAAGAAGCTGTc                                                        |
| miR-22-SM-U-target     | tcgagTATGCTCGATTAG GGCAGCT<br>ACCTATGCTCGATTAG GGCAGCT<br>ACCTATGCTCGATTAG GGCAGCT ACCg | aattcGGTAGCTGCCCTAATCGAGCATAGGTA<br>GCTGCCCTAATCGAGCATAGGTAGCTGCC<br>TAATCGAGCATAc   |
| miR-22-SM-C-target     | tcgagTATGCTCGATTAG GGCAGCC<br>ACCTATGCTCGATTAG GGCAGCC<br>ACCTATGCTCGATTAG GGCAGCC ACCg | aattcGGTGGCTGCCCTAATCGAGCATAGGTT<br>GCTGCCCTAATCGAGCATAGGTGGCTGCC<br>TAATCGAGCATAc   |
| miR-191-CM-U-target    | tcgagCAGCTGCTTTTGGGATTCCGTTGg                                                           | aattcCAACGGAATCCCAAAGCAGCTGc                                                         |
| miR-191-CM-C-target    | tcgagCAGCTGCTTTTGGGATTCCGCTGg                                                           | aattcCAGCGGAATCCCAAAGCAGCTGc                                                         |
| miR-191-SM-U-target    | tcgagTATGCTCGATTAG TTCCGTT<br>ACCTATGCTCGATTAG TTCCGTT<br>ACCTATGCTCGATTAG TTCCGTT ACCg | aattcGGTAACGGAATAATCGAGCATAGGTA<br>ACGGAATAATCGAGCATAGGTAACGGAAC<br>TAATCGAGCATAc    |
| miR-191-SM-C-target    | tcgagTATGCTCGATTAG TTCCGCT<br>ACCTATGCTCGATTAG TTCCGCT<br>ACCTATGCTCGATTAG TTCCGCT ACCg | aattcGGTAGCGGAATAATCGAGCATAGGTA<br>GCGGAATAATCGAGCATAGGTAGCGGAAC<br>TAATCGAGCATAc    |
